# Supplementary material for: Does geriatric follow-up visits reduce hospital readmission among older patients discharged to temporary care at a skilled nursing facility: a before-and-after cohort study
Source: PubMed Central journal article supplement — BMJ Open. 2021 Aug 13;11(8):e046698. doi: 10.1136/bmjopen-2020-046698 (PMC8365788; doi:10.1136/bmjopen-2020-046698), 2021-08-13
Supplement: bmjopen-2020-046698.draft_revisions.pdf [file bmjopen-2020-046698.draft_revisions.pdf]

# BMJ Open

BMJ Open is committed to open peer review. As part of this commitment we make the peer review history of every article we publish publicly available.

When an article is published we post the peer reviewers' comments and the authors' responses online. We also post the versions of the paper that were used during peer review. These are the versions that the peer review comments apply to.

The versions of the paper that follow are the versions that were submitted during the peer review process. They are not the versions of record or the final published versions. They should not be cited or distributed as the published version of this manuscript.

BMJ Open is an open access journal and the full, final, typeset and author-corrected version of record of the manuscript is available on our site with no access controls, subscription charges or pay-per-view fees (<http://bmjopen.bmj.com>).

If you have any questions on BMJ Open's open peer review process please email [info.bmjopen@bmj.com](mailto:info.bmjopen@bmj.com)

# BMJ Open

## Does geriatric follow-up visits reduce hospital readmission among older patients discharged to temporary care at a skilled nursing facility – a before and after cohort study

|                               |                                                                                                                                                                                                                                                                                                                                                                                                                                                                                                                                                                                                                                                                                                                                                                                                  |
|-------------------------------|--------------------------------------------------------------------------------------------------------------------------------------------------------------------------------------------------------------------------------------------------------------------------------------------------------------------------------------------------------------------------------------------------------------------------------------------------------------------------------------------------------------------------------------------------------------------------------------------------------------------------------------------------------------------------------------------------------------------------------------------------------------------------------------------------|
| Journal:                      | <i>BMJ Open</i>                                                                                                                                                                                                                                                                                                                                                                                                                                                                                                                                                                                                                                                                                                                                                                                  |
| Manuscript ID                 | bmjopen-2020-046698                                                                                                                                                                                                                                                                                                                                                                                                                                                                                                                                                                                                                                                                                                                                                                              |
| Article Type:                 | Original research                                                                                                                                                                                                                                                                                                                                                                                                                                                                                                                                                                                                                                                                                                                                                                                |
| Date Submitted by the Author: | 06-Nov-2020                                                                                                                                                                                                                                                                                                                                                                                                                                                                                                                                                                                                                                                                                                                                                                                      |
| Complete List of Authors:     | Thomsen , Katja ; Syddansk Universitet Det Sundhedsvidenskabelige Fakultet, Geriatric Research Unit, Department of Clinical Research; Odense University Hospital, Department of Geriatric Medicine<br>Fournaise, Anders; Odense University Hospital, Department of Geriatric Medicine; Region of Southern Denmark, Department of Cross-sectoral Collaboration<br>Matzen, Lars; Odense University Hospital, Department of Geriatric Medicine; University of Southern Denmark, Geriatric Research Unit, Department of Clinical Research<br>Andersen-Ranberg, Karen; University of Southern Denmark, Department of Public Health; Odense University Hospital, Geriatric Research Unit, Department of Clinical Research<br>Ryg, Jesper; Odense University Hospital, Department of Geriatric Medicine |
| Keywords:                     | GERIATRIC MEDICINE, INTERNAL MEDICINE, Rehabilitation medicine < INTERNAL MEDICINE                                                                                                                                                                                                                                                                                                                                                                                                                                                                                                                                                                                                                                                                                                               |
|                               |                                                                                                                                                                                                                                                                                                                                                                                                                                                                                                                                                                                                                                                                                                                                                                                                  |

SCHOLARONE™  
Manuscripts

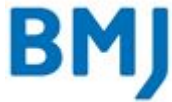

I, the Submitting Author has the right to grant and does grant on behalf of all authors of the Work (as defined in the below author licence), an exclusive licence and/or a non-exclusive licence for contributions from authors who are: i) UK Crown employees; ii) where BMJ has agreed a CC-BY licence shall apply, and/or iii) in accordance with the terms applicable for US Federal Government officers or employees acting as part of their official duties; on a worldwide, perpetual, irrevocable, royalty-free basis to BMJ Publishing Group Ltd ("BMJ") its licensees and where the relevant Journal is co-owned by BMJ to the co-owners of the Journal, to publish the Work in this journal and any other BMJ products and to exploit all rights, as set out in our [licence](#).

The Submitting Author accepts and understands that any supply made under these terms is made by BMJ to the Submitting Author unless you are acting as an employee on behalf of your employer or a postgraduate student of an affiliated institution which is paying any applicable article publishing charge ("APC") for Open Access articles. Where the Submitting Author wishes to make the Work available on an Open Access basis (and intends to pay the relevant APC), the terms of reuse of such Open Access shall be governed by a Creative Commons licence – details of these licences and which [Creative Commons](#) licence will apply to this Work are set out in our licence referred to above.

Other than as permitted in any relevant BMJ Author's Self Archiving Policies, I confirm this Work has not been accepted for publication elsewhere, is not being considered for publication elsewhere and does not duplicate material already published. I confirm all authors consent to publication of this Work and authorise the granting of this licence.

*Does geriatric follow-up visits reduce hospital readmission among older patients discharged to temporary care at a skilled nursing facility - a before and after cohort study*

1  
2  
3  
4 1 Title page

5 2

6 3 **Does geriatric follow-up visits reduce hospital readmission among older patients discharged**  
7 **to temporary care at a skilled nursing facility – a before and after cohort study**

8 4  
9 5

10 6 \*Katja Thomsen (ORCID - 0000-0002-0454-836X)<sup>1,4</sup>, \*Anders Fournaise (ORCID - 0000-0002-4754-  
11 7 7500)<sup>1,2,3,4</sup>, Lars Matzen (ORCID - 0000-0003-3706-8554)<sup>1,4</sup>, Karen Andersen-Ranberg (ORCID -  
12 8 0000-0003-1970-7076)<sup>1,3,4</sup>, Jesper Ryg (ORCID - 0000-0002-8641-3062)<sup>1,4</sup>

13 9 \*co-first authors

14 10

15 11 <sup>1</sup> Department of Geriatric Medicine, Odense University Hospital, Odense, Denmark

16 12 <sup>2</sup> Department of Cross-sectoral Collaboration, Region of Southern Denmark, Vejle, Denmark

17 13 <sup>3</sup> Epidemiology, Biostatistics and Biodemography, Department of Public Health, University of Southern  
18 14 Denmark, Odense, Denmark

19 15 <sup>4</sup> Geriatric Research Unit, Department of Clinical Research, University of Southern Denmark, Odense,  
20 16 Denmark

21 17

22 18 **Corresponding author**

23 19 Katja Thomsen, Department of Geriatric Medicine, Odense University Hospital, J. B. Winsløws Vej 4,  
24 20 DK-5000 Odense C. E-mail: katja.thomsen@rsyd.dk / 0045 6541 4605

25 21  
26  
27  
28  
29  
30  
31  
32  
33  
34  
35  
36  
37  
38  
39  
40  
41  
42  
43  
44  
45  
46  
47  
48  
49  
50  
51  
52  
53  
54  
55  
56  
57  
58  
59  
60

*Does geriatric follow-up visits reduce hospital readmission among older patients discharged to temporary care at a skilled nursing facility - a before and after cohort study*

## 1 **Abstract**

### 2 **Introduction**

3 Hospital readmission is a burden to patients, relatives, and society. Older patients with frailty are at  
4 highest risk of readmission and its negative outcomes.

### 5 **Objective**

6 We aimed at examining whether follow-up visits by an outgoing multidisciplinary geriatric team (OGT)  
7 reduces unplanned hospital readmission in older patients discharged to a skilled nursing facility  
8 (SNF).

### 9 **Design**

10 A retrospective single-centre before and after cohort study.

### 11 **Setting and participants**

12 Study population included all hospitalised patients discharged from a geriatric department to a SNF  
13 during 1 January 2016 – 25 February 2020. To address potential changes in discharge and  
14 readmission patterns during the study period, patients discharged from the same geriatric department  
15 to own home were also assessed.

### 16 **Intervention**

17 OGT visits at SNF within seven days following discharge. Patients discharged to SNF before 12  
18 March 2018 did not receive OGT (-OGT). Patients discharged to SNF on or after 12 March 2018  
19 received the intervention (+OGT).

### 20 **Main outcome measures**

21 Unplanned hospital readmission between 4 hours and 30 days following initial discharge.

### 22 **Results**

23 A total of 847 patients were included (440 -OGT; 407 +OGT). No difference was seen between the  
24 two groups regarding age, sex, activities of daily living (ADL), Charlson Comorbidity Index (CCI), or  
25 30-day mortality. The cumulative incidence of readmission was 39.8% (95% CI 35.2-44.8, n=162) in -  
26 OGT and 30.2% (95% CI 25.8-35.2, n=113) in +OGT. The unadjusted risk (HR (95% CI)) of  
27 readmission was 0.68 (0.54-0.87, p=0.002) in +OGT compared to -OGT, and remained significantly  
28 lower (0.72 (0.57-0.93, p=0.011)) adjusting for age, length of stay, sex, ADL, and CCI. For patients  
29 discharged to own home the risk of readmission remained unchanged during study period.

### 30 **Conclusion**

31 Follow-up visits by OGT to patients discharged to temporary care at a SNF significantly reduced 30-  
32 day readmission in older patients.

### 34 **Trail registration**

35 Danish Data Protection Agency (rec.nr. 20/1681).

Does geriatric follow-up visits reduce hospital readmission among older patients discharged to temporary care at a skilled nursing facility - a before and after cohort study

#### Strengths and limitations of this study

- This was a hospital-based before and after cohort study with no patients lost to follow-up
- We accounted for the competing risk of death and adjusted for potential confounders in our analysis (age, sex, activities of daily living, comorbidity, and length of stay)
- We explored general changes in readmission pattern not related to the intervention
- This was a before and after cohort study, which has a risk of overestimating the effect
- This was a single centre study, which may limit the generalisability of study results

#### Keywords

Readmission, Follow-up visit, Outgoing team, Geriatrics, Older people, Integrated care

#### Word count

3566 words

*Does geriatric follow-up visits reduce hospital readmission among older patients discharged to temporary care at a skilled nursing facility - a before and after cohort study*

## 1 Introduction

2 Acute hospitalisation can be lifesaving but may also lead to adverse health outcomes in older adults,  
3 such as hospital-acquired infections and poorer functional health, as well as anxiety and distress<sup>1-7</sup>.

4 Some acute hospitalisations are preventable, and readmissions in particular are therefore in focus for  
5 preventive initiatives. The risk of readmission increases with age, especially in patients characterised  
6 by high age, multimorbidity, polypharmacy, longer in-hospital stay, lower functional status, male sex,  
7 and prior hospitalisation<sup>8-10</sup>. After an acute treatment, such vulnerable patients may be transferred to  
8 a post-acute care facility for further stabilisation of medical and functional health, either in a hospital or  
9 in a skilled nursing facility (SNF). SNF is an in-patient rehabilitation centre staffed with trained medical  
10 professionals and affiliated primary care physicians, SNF offers a temporary residence for patients  
11 undergoing medically necessary rehabilitation and treatment.

12 Interventions to prevent readmission among older adults are widely studied. Several models have  
13 been investigated, involving various staff groups (i.e. pharmacist, nurse, primary care physician,  
14 geriatrician) and different point of actions (i.e. nutrition, medication, exercise, care)<sup>11-14</sup>, but no single  
15 or a bundle of interventions appears to reduce hospital readmission reliably<sup>15-17</sup>. For patients  
16 discharged to a SNF, only few intervention studies exist<sup>4-6 18 19</sup>, mainly from countries with a mixture  
17 of public and private health care providers.

18 Our aim was to examine whether early follow-up visits by an outgoing multidisciplinary (nurse and  
19 doctor) geriatric team (OGT) reduce acute hospital readmission in older vulnerable patients  
20 discharged to a temporary stay in a SNF.

## 21 Methods

### 22 *Design*

23 We conducted a retrospective single-centre, before and after cohort study, following the  
24 implementation of an OGT at a SNF in the municipality of Odense, Denmark.

### 26 *Settings*

27 In Denmark, all citizens have free access to their primary care physician, hospital treatment, and  
28 health care services including home care due to a tax-funded public health care system<sup>20</sup>. Odense  
29 University Hospital is a highly specialised hospital, which serves citizens in the Region of Southern  
30 Denmark. It is the main hospital for the citizens of Odense municipality with approximately 200,000  
31 inhabitants, of which 17% are above 65 years of age<sup>21</sup>. The Department of Geriatric Medicine at  
32 Odense University Hospital consists of a medical ward with 38 beds. All patients are admitted as  
33 acute patients from the emergency department or transferred from other departments. They are  
34 characterised by having a high age and suffering from multimorbidity, polypharmacy, and functional  
35 decline in addition to their acute medical illness. The department has a close collaboration with  
36 Odense Municipality, which is responsible for providing home- and nursing care services for patients

*Does geriatric follow-up visits reduce hospital readmission among older patients discharged to temporary care at a skilled nursing facility - a before and after cohort study*

1 after hospital discharge<sup>20</sup>. Most patients (87%) are discharged to the same residence they had before  
2 admission. However, patients admitted to hospital from their own home, but at the time of discharge  
3 unable to return to their own home due to social, physical, or medical reasons, are discharged to a  
4 municipal SNF for temporary care and rehabilitation.

5 The SNF of Odense municipality hosts 64 temporary beds and has a turnover of approximately 1,000  
6 patients a year with an average length of stay of 24 days (unpublished administrative data). The SNF  
7 staff includes nurses, social and healthcare assistants, physiotherapists, and occupational therapist,  
8 but there is no staff physician. If a patient needs medical attention, the SNF staff contacts the patient's  
9 personal primary care physician.

### *Intervention*

10 The OGT was initiated 12 March 2018. It consisted of a geriatric nurse and a specialist geriatrician,  
11 who in close collaboration with the patient and the SNF-staff dealt with any health issues related to  
12 the recent hospital admission and discharge i.e. effect and side-effects of initiated treatment,  
13 nutritional, and rehabilitation issues. The OGT consulted patients at the SNF within seven days  
14 following hospital discharge. The OGT had access to the patients' electronic hospital records,  
15 including records from physicians, nurses, occupational- and physiotherapists, and an updated list of  
16 medications. Moreover, the team could carry out collection of venous blood samples, urine, and stool-  
17 tests, when needed. The SNF-staff measured blood pressure, pulse, temperature, and blood oxygen  
18 saturation ahead of OGT visits. The OGT visited the SNF three times a week, a total of six hours per  
19 week. Patients received at least one visit from the OGT during the follow-up.

### *Participants*

20 We included all patients discharged from the Department of Geriatric Medicine at Odense University  
21 Hospital from 1 January 2016 to 25 February 2020. Eligible patients were identified from Odense  
22 University Hospital's patient administrative system and the Odense municipality's electronic care  
23 journal. Patients discharged to SNF (SNF patients) prior to initiation of OGT 12 March 2018 were  
24 categorized as -OGT and as +OGT if discharged on or after. Further, in order to explore time trends  
25 and potential variations in discharge, readmission patterns, and patient characteristics during the  
26 study period, we categorized patients discharged to own home (non-SNF patients) prior to 12 March  
27 2018 as pre-OGT and those discharged on or after 12 March 2018 as post-OGT.

### *Variables and Data Sources*

28 The primary outcome was 30-days readmission rate. Readmission was defined as any  
29 acute/unplanned hospital admission within 4 hours and 30 days after discharge from the Department  
30 of Geriatric Medicine<sup>22</sup>. Index-admission was defined as any unplanned admission to the Department  
31 of Geriatric Medicine during the study period. Patients with several hospital admissions could have  
32 several index admissions but only one readmission per index admission. Thereby each unplanned  
33 admission to the geriatric department counted as an index admission.



*Does geriatric follow-up visits reduce hospital readmission among older patients discharged to temporary care at a skilled nursing facility - a before and after cohort study*

We used the patient's unique civil registration code to extract data from Odense University Hospitals patient administrative system for each index admission. Data included information of unplanned hospital admissions, date and time of the admission and discharge, location, type, and hospital department. Length of index admissions and readmissions were derived from medical records. Participants' characteristics e.g. age, sex, and information on mortality was obtained from the Civil Registration System. Information of comorbidity and Barthel index (BI) were obtained from Odense University Hospitals patient administrative system or directly from medical records when missing in the register (n=59). BI is a measure of function in activity of daily living (ADL), with a sum score across ten domains of ADL. BI is the official ADL tool used in Danish hospitals and assessed routinely upon hospital admission<sup>23</sup>. The total score ranges from 0 (completely dependent) to 100 (completely independent). In Denmark BI is categorized in four standard diagnostic categories BI=80-100 (independent ADL), BI=50-79 (moderate reduced ADL), BI=25-49 (low ADL), and BI=0-24 (very low ADL). The burden of comorbidity was assessed using Charlson Comorbidity Index (CCI), which was computed based on all primary and secondary discharge diagnoses registered in the hospital's electronic patient journal the past four years. The CCI score was divided into three levels: low (score of 0), moderate (score of 1-2), and high (score of  $\geq 3$ )<sup>24</sup>. The health-interventions by the OGT were registered in an administrative database without any personally identifiable data. This database provided summary data of the interventions made by the OGT (i.e. adjustments of medication, blood samples, nutritional advice, information of tests/examinations, and intervention from a specialised acute nursing function). Data of number of OGT-visits per patient were extracted from the patient administrative system.

### *Statistical Analysis*

The study sample size was calculated from expected change in readmission rate 'before and after'. The inclusion of 367 patients in each group would give the study 80% power to detect a 30% reduction in readmission rate assuming a baseline readmission rate of 30%<sup>19</sup>, with a level of significance of 5%. This power calculation was used to define the length of the study period in order to ensure an adequate sample size. Patient characteristics were reported using numbers/percentages, means (SD), and medians [IQR]. Differences between groups were calculated using chi<sup>2</sup> tests, Student's *t*-test, or Kruskal-Wallis test, as appropriate. The primary outcome, readmission rate, was calculated as the total number of 30 days readmissions divided by total number of index admissions. A Cox proportional hazard model for readmission within 30 days was used to investigate the effect of the OGT. Patients who died or moved to another municipality within 30 days after discharge were censored from analysis and the model was adjusted for age, length of stay (LOS), sex, CCI, and BI. The incidence of readmission was plotted as a function of time in a Kaplan-Meier plot of cumulative incidence. The analysis did not include patients with a follow-up of less than 12 hours. The proportional-hazard assumption was tested using Schoenfeld residuals. The statistical significance threshold for all tests was set to  $P < 0.05$ . STATA software version 16 (StataCorp LLC, Texas, USA) was used for statistical analysis.

*Does geriatric follow-up visits reduce hospital readmission among older patients discharged to temporary care at a skilled nursing facility - a before and after cohort study*

1  
2  
3  
4 **1 Ethics**

5 2 The study was approved by the Danish Data Protection Agency (rec. nr. 20/1681) and reported  
6 3 according to STROBE (Strengthening the Reporting of Observational Studies in Epidemiology)  
7 4 guidelines<sup>25</sup>. Approval by ethical committee and informed consent was not necessary according to  
8 5 Danish legislation on medical ethics due to the register-based study design<sup>26</sup>.  
9 6

10 7 **Results**

11 8 A total of 6,624 patients (54.1% women) were discharged from the Department of Geriatric Medicine  
12 9 during the study period with a mean (SD) age of 83.0 (8.8) years. Of these, 847 patients (women  
13 10 56.1%) with a mean (SD) age 84.2 (8.3) years were discharged to the SNF (-OGT: n=440 and +OGT:  
14 11 n=407) (Table 1) whereas 5,777 patients (women 53.8%) with a mean (SD) age of 82.9 (8.8) (pre-  
15 12 OGT=3,343 and post-OGT=2,434) were discharged to their own home (non-SNF) (figure 1).  
16 13

17 14 *Characteristics and outcome data for SNF patients (-OGT and +OGT) (n=847)*

18 15 No difference was found between -OGT (n=440) and +OGT (n=407) regarding age, sex, BI, CCI, and  
19 16 30-days mortality. Median [IQR] LOS of index-admission was 7.8 [5.0-12.8] days and 6.0 [3.9-10.0]  
20 17 days in -OGT and +OGT, respectively (p≤0.0001) (Table 1). The median number of OGT visits pr.  
21 18 patient was 1 ([IQR 1-2] range 1-10). The proportion of patients visited more than once was 38%. In  
22 19 32% of the visits the patients had adjustments to their medication, 14% had blood samples taken,  
23 20 12% were given nutritional advice, 5% were informed of tests-results (i.e. x-ray, endoscopy), and 6%  
24 21 received intervention from a specialised municipal acute nursing function.  
25 22

26 23 The 30-days readmission rate was 36.8% (n=162) and 27.8% (n=113) in -OGT and +OGT group,  
27 24 respectively (p=0.005). The cumulative incidence of readmission (95% CI) was 39.8% (35.2-44.8) in  
28 25 the -OGT group and 30.2% (25.8-35.2) in +OGT group (figure 2). Unadjusted risk (HR (95% CI)) of  
29 26 readmission was 0.68 (0.54-0.87, p=0.002) in the +OGT group compared to the -OGT group. Risk of  
30 27 readmission remained lower in the +OGT group in the fully adjusted model (0.72 (0.57-0.93),  
31 28 p=0.011). Subgroup analysis defining readmission as an unplanned hospital contact with a duration of  
32 29 12+ hours, occurring between 4 hours and 30 days after discharge from the Department of Geriatric  
33 30 Medicine did not change the results (data not shown).  
34 31

35 32 Patients had a wide spectrum of primary diagnoses at index admission and readmission with no  
36 33 difference between the two groups in regards of proportions within each ICD-10 groups (Chi<sup>2</sup>). The  
37 34 three most common ICD-10 groups were diseases of the respiratory organs (ICD10: J00-J99) (-OGT:  
38 35 27% and +OGT: 22%, p=0.127); endocrine, nutritional, and metabolic diseases (ICD10: E00-E90) (-  
39 36 OGT: 10% and +OGT: 12%, p=0.271); and certain infectious and parasitic diseases (ICD10: A00-  
40 37 B99) (-OGT: 9% and +OGT: 9%, p=0.996). The three most common ICD-10 groups at readmission  
41 38 were diseases of the respiratory organs (ICD10: J00-J99) (-OGT: 29% and +OGT: 17%, p=0.069);  
42 39 injury, poisoning, and certain other consequences of external causes (ICD10: S00-T98) (-OGT: 11%  
43 40 and +OGT: 12%, p=0.834); and diseases of the circulatory system (ICD10: I00-I99) (-OGT: 10% and  
44 40 +OGT: 11%, p=0.692).

*Does geriatric follow-up visits reduce hospital readmission among older patients discharged to temporary care at a skilled nursing facility - a before and after cohort study*

1

2 **Characteristics and outcome data for non-SNF patients (pre-OGT and post-OGT) (n=5,777)**

3 No difference in age, sex, CCI, and 30-days mortality was found between the pre-OGT (n=3,343) and  
4 post-OGT (n=2,434) groups. The distribution of BI in the four subcategories differed significantly  
5 between groups (p=0.012). BI 80-100: pre-OGT = 13.8% and post-OGT = 12.5%; BI 50-79: pre-OGT  
6 = 27.6% and post-OGT = 27.0%; BI 25-49: pre-OGT = 21.4% and post-OGT = 24.7%; BI 0-24: pre-  
7 OGT = 32.4% and post-OGT = 5.6%. Median [IQR] LOS of index-admission was 5.1 [3.1-7.9] days  
8 and 4.8 [2.9-6.9] days in pre-OGT and post-OGT groups, respectively (p<0.0001) (table 2).

9 Among the pre-OGT and post-OGT groups the 30 days readmission rate was 26.5% (n=887) and  
10 27.8% (n=676) (p=0.295), respectively. The cumulative incidence of readmission (95% CI) was 29.1%  
11 (27.5-30.7) in pre-OGT and 28.8% (27.0-30.7) in post-OGT (figure 3). No difference was found in the  
12 risk of readmission between the pre-OGT and post-OGT group, neither for unadjusted nor adjusted  
13 risk (HR (95%CI)) of 1.00 (0.90-1.10, p=0.922) and 1.01 (0.91-1.11, p=0.920), respectively.

14

15 **Discussion**

16 This study shows that follow-up visits by an outgoing multidisciplinary geriatric team reduces hospital  
17 readmissions among patients discharged from a geriatric department to a skilled nursing facility. The  
18 results remained significant even after adjusting for sex, age, in hospital length of stay, comorbidity,  
19 and functional status.

20

21 To our knowledge, only few other studies have assessed interventions to prevent readmission among  
22 patients discharged to SNF <sup>4-6 19</sup>. A retrospective study from Cleveland (US) demonstrated a  
23 significant reduction in readmission rates from 28% to 22% (p< 0.001) after implementation of a  
24 connected care model <sup>6</sup>. The applied model was very extensive with patients receiving visits from an  
25 outgoing team including doctors and nurses 4-5 times a week after discharge from hospital to SNF  
26 and telephone coverage at nights, weekends, and monthly meetings with multidisciplinary teams. This  
27 extensive model may be difficult to apply in other settings. Another US-study explored whether  
28 readmission could be reduced by implementing video conference to improve transition between  
29 hospital and a SNF <sup>5</sup>. Videoconference reduced the 30-day readmission rate from 24% to 15% (OR  
30 0.57 95% CI 0.34-0.96, p=0.04). However, this was a prospective cohort study comparing pre- and  
31 post-intervention rates in two different SNF's. The effect was mainly due to an increase of  
32 readmission in the control-cohort rather than a reduction of readmissions in the intervention-group <sup>5</sup>.  
33 Interpretation and application of these studies' results to a different health care system, as the Danish,  
34 should be done with care, as large organizational variations exist across countries. A Danish  
35 randomized controlled trial studied the effect of comprehensive geriatric care offered to patients 65  
36 years and older, referred from any hospital department to a rehabilitation unit <sup>19</sup>. The study did not  
37 show any reduction in 90 days hospital readmission rates in the intervention group compared to usual  
38 care. However, the study did not explore 30-days readmission rates specifically and the negative  
39 result may be due to a spill over effect, i.e. the intervention may have affected the control group, and a  
40 non-real-life setting since the intervention was performed by a single geriatrician only <sup>19</sup>.

*Does geriatric follow-up visits reduce hospital readmission among older patients discharged to temporary care at a skilled nursing facility - a before and after cohort study*

1  
2  
3  
4 1 Among the SNF-patients in our study, the pre-intervention 30-days readmission rate was 36%, which  
5 2 is high compared to an overall readmission rate of 18% among older hospitalised patients in Denmark  
6 3 <sup>27</sup>. However, it is well known that patients discharged to SNF or other post-acute care facilities have a  
7 4 higher risk of readmission. A study of patients discharged to post-acute care facility demonstrated a  
8 5 readmission rate of 22% and most readmissions (80%) occurred within 30 days of discharge <sup>28</sup>. Other  
9 6 studies on patients discharged to temporary care have shown 30-days readmission rates between 24-  
10 7 28% <sup>4-6</sup>. This variation in readmission rates between studies, may be explained by differences in  
11 8 patient characteristics, since other studies have included all patients resident at a SNF including  
12 9 patients referred to the SNF from home or a surgical department. Our study solely included the most  
13 10 vulnerable patients discharged from a geriatric department, characterised by high age, low functional  
14 11 status, and multi-morbidity and therefore at highest risk of readmission <sup>8-10</sup>. Moreover, there may be  
15 12 differences in the definition of readmission <sup>29</sup>. Our definition included any unplanned hospital contact  
16 13 within 30 days of discharge, thereby including brief contacts to the emergency department.  
17 14 In-hospital LOS declined significantly during the study period. However, this decline was not reflected  
18 15 by a change in disease-burden since CCI or primary diagnoses of hospital admission remained  
19 16 unchanged. The trend towards shorter hospital stay seen in our study is also reported on a national  
20 17 and European basis <sup>30</sup>. In our study, LOS did not affect the readmission rate.  
21 18 We found no difference in the proportion of men and women, which is surprising, since other studies  
22 19 of similar geriatric cohorts have shown a higher proportion of women compared to men <sup>31</sup>. However,  
23 20 our sex-ratio corresponds to the sex-ratio shown in the Danish national database of geriatrics 2019 <sup>32</sup>.

### **Strengths and limitations of this study**

24 22 Our study has limitations. Firstly, this was a before and after study, which has a risk of overestimating  
25 23 the effect <sup>33</sup> due to residual confounding. The participants in the intervention group (+OGT) may have  
26 24 been exposed to other non-identified factors compared to the control group. However, readmission  
27 25 rates among non-SNF patients remained unchanged in the pre-OGT and post-OGT groups  
28 26 highlighting that no general change in the pattern of admissions occurred during the study period.  
29 27 Secondly, this was a single centre study, which limits the generalizability of study results.  
30 28 Furthermore, as no consensus-definition of SNF exists, other studies may represent differently  
31 29 organized SNF's, dissimilar patient populations, and other discharge procedures from geriatric  
32 30 departments worldwide, also limiting the generalizability. Thirdly, the study only included data on  
33 31 hospital readmissions at Odense University Hospital, which may underestimate the risk of  
34 32 readmissions. However, only patients, who would have travelled or moved to other municipalities  
35 33 outside Odense, would be at risk of readmission to other hospitals than Odense University Hospital. In  
36 34 our dataset, we were able to track all patients, and none had residence outside the municipality of  
37 35 Odense within 30 days after discharge.  
38 36 The study also has several strengths. We used data from registers with no patients lost to follow-up.  
39 37 In addition, we performed power- and sample size calculation when planning the study to ensure  
40 38 appropriate length of study period. The adjusted analysis involved patient characteristics including  
41 39 measures of activities of daily living (Barthel-Index), comorbidity (Charlson Comorbidity Index), and  
42 40

*Does geriatric follow-up visits reduce hospital readmission among older patients discharged to temporary care at a skilled nursing facility - a before and after cohort study*

LOS, which are important risk factors for readmission<sup>8-10</sup>. Furthermore, our results are strengthened by accounting for the competing risk of death in our analysis, censoring those who died within 30 days of discharge. Finally, the study was carried out in a real-life setting and therefore implementable in similar settings.

Several elements of our OGT-intervention may have been crucial in the prevention of readmissions. The OGT facilitated a close co-operation between hospital, patient, and SNF, which potentially prevented miscommunication and loss of information in the transition from secondary to primary care sector. Furthermore, early detection and correction of ambiguities and inadequate hospital care plans may have led to improved and shared goals of care for the benefit of the patient. A shared responsibility of the patient in the early days after discharge may have ensured confidence among patients, relatives, and caregivers and prevented unnecessary contacts to doctors on call or emergency doctors. Lastly, reassessment of the patient's medical condition may have led to early detection and treatment of recurrence of disease, thereby preventing readmission.

Despite the obvious potential benefit of outgoing hospital teams, the intervention is costly and hospital resources are redistributed outside the hospital. In our set-up, limiting the post-discharge follow-up visit to patients discharged to SNF reduced the time-expenditure since all patients were discharged to the same SNF and therefore the intervention may have been economical rentable. Cost-effective analysis of the intervention remains to be assessed, before dissemination of this model. Our study does not give insight to sub-elements of the intervention, but further studies with an explorative or qualitative design may provide further insight important to elements to address in the prevention of readmission. Such insight may be valuable in the development of less costly interventions, such as telemedicine. Telemedicine and videoconference are likely to be less costly and perhaps as effective tools for post-discharge follow-up, which calls for further exploration.

### **Conclusion**

Follow-up visits by an outgoing multidisciplinary geriatric team significantly reduced 30-days readmission rates by 28% in older vulnerable patients recently discharged from hospital to a skilled nursing facility.

### **Author Contributions**

KT is the guarantor of the study. KT and AF directed and contributed equally to all aspects of this manuscript. KAR, JR, and LM contributed to study design, data interpretation, and writing. All authors have commented, read, and approved the final manuscript.

### **Funding**

The Region of Southern Denmark and Odense University Hospital funded the study. The funders were not involved in the design and conduct of the study; collection, management, analysis, and

*Does geriatric follow-up visits reduce hospital readmission among older patients discharged to temporary care at a skilled nursing facility - a before and after cohort study*

1  
2  
3  
4 1 interpretation of the data; preparation, review, or approval of the manuscript; and decision to submit  
5 2 the manuscript for publication.  
6  
7 3

8 4 **Conflicts of Interest statement**

9 5 The authors declare that no conflicts of interest are associated with this publication.  
10 6

11 7 **Patient and public involvement:**

12 8 Neither patients nor the public were involved in the design, conduct, reporting, or dissemination of the  
13 9 study.  
14 10

15 11 **Patient consent for publication:**

16 12 Not required  
17 13

18 14 **Provenance and peer review**

19 15 Not commissioned; externally peer review  
20 16

21 17 **Data availability**

22 18 Data are available upon reasonable request  
23 19

24 20 **Acknowledgements**

25 21 We wish to thank Rolf Kjærby (Odense University Hospital) and Rune Pedersen (Region of Southern  
26 22 Denmark) for their assistance in retrieving and merging data from the respective electronic patient  
27 23 journals and administrative systems, and Eva Sandberg and Inge Pedersen (OPEN - Open Patient  
28 24 data Explorative Network, Odense University Hospital, Region of Southern Denmark) for statistical  
29 25 counselling. A special thanks to the personnel at Lysningen (Odense Municipality) and the  
30 26 Department of Geriatric Medicines (Odense University Hospital) for their commitment and willingness  
31 27 to implement the outgoing geriatric function and cross-sectoral collaboration.  
32  
33  
34  
35  
36  
37  
38  
39  
40  
41  
42  
43  
44  
45  
46  
47  
48  
49  
50  
51  
52  
53  
54  
55  
56  
57  
58  
59  
60

*Does geriatric follow-up visits reduce hospital readmission among older patients discharged to temporary care at a skilled nursing facility - a before and after cohort study*

1  
2  
3  
4 **1 Legends**

5 2 Figure 1: Timeline of patients discharged from the Department of Geriatric Medicine according to  
6 3 discharge destination and initiation of outgoing geriatric team. Abbreviations: OGT: outgoing geriatric  
7 4 team, pre-OGT; before implementation of OGT, post-OGT; after implementation of OGT, SNF; skilled  
8 5 nursing facility  
9 6

10 7 Figure 2: Kaplan-Meier curves of cumulative incidence of 30-days readmissions for any unplanned  
11 8 readmission for patients discharged to skilled nursing facility and outgoing geriatric team compared to  
12 9 patients discharged to skilled nursing facility only. Abbreviations: OGT: outgoing geriatric team  
13 10

14 11 Figure 3: Kaplan-Meier curves of cumulative incidence of 30-days readmissions for any unplanned  
15 12 readmission for patients discharged to own home. Before and after implementation of outgoing  
16 13 geriatric team (pre-OGT and post-OGT). Abbreviations: OGT: outgoing geriatric team  
17  
18  
19  
20  
21  
22  
23  
24  
25  
26  
27  
28  
29  
30  
31  
32  
33  
34  
35  
36  
37  
38  
39  
40  
41  
42  
43  
44  
45  
46  
47  
48  
49  
50  
51  
52  
53  
54  
55  
56  
57  
58  
59  
60

*Does geriatric follow-up visits reduce hospital readmission among older patients discharged to temporary care at a skilled nursing facility - a before and after cohort study*

1 Table 1: Characteristics of patients discharged from Department of Geriatric Medicine to a skilled  
2 nursing facility without follow-up (-OGT) or with follow-up (+OGT) by an outgoing geriatric team

|                                            | <b>-OGT<br/>(n=440)</b> | <b>+OGT<br/>(n=407)</b> | <b>p</b> |
|--------------------------------------------|-------------------------|-------------------------|----------|
| Age, y, mean (SD)                          | 84.2 (8.0)              | 84.2 (8.5)              | 0.980    |
| Female, n (%)                              | 240 (54.6)              | 235 (57.9)              | 0.329    |
| Barthel Index, n (%)                       |                         |                         | 0.600    |
| 80-100                                     | 12 (2.8)                | 9 (2.2)                 |          |
| 50-79                                      | 80 (18.7)               | 71 (17.4)               |          |
| 25-49                                      | 121 (28.3)              | 117 (28.8)              |          |
| 0-24                                       | 215 (50.2)              | 191 (46.9)              |          |
| missing                                    | 12 (2.7)                | 19 (4.7)                |          |
| CCI, median [IQR]                          | 2 [1-3]                 | 2 [1-3]                 | 0.182    |
| CCI, n (%)                                 |                         |                         | 0.370    |
| 0                                          | 93 (21.1)               | 99 (24.3)               |          |
| 1-2                                        | 165 (37.5)              | 157 (38.6)              |          |
| ≥3                                         | 182 (41.4)              | 151 (37.1)              |          |
| LOS, days (index admission) median [IQR]   | 7.8 [5.0-12.8]          | 6.0 [3.9-10.0]          | 0.0001   |
| Died within 30 days after discharge, n (%) | 75 (17.1)               | 68 (16.7)               | 0.896    |

3 Abbreviations: SD standard deviation, CCI: Charlson Comorbidity Index, LOS: length of stay (in  
4 hospital), IQR: inter quartile range, OGT: outgoing geriatric team



*Does geriatric follow-up visits reduce hospital readmission among older patients discharged to temporary care at a skilled nursing facility - a before and after cohort study*

1 Table 2: Characteristics for patients not discharged to skilled nursing facility from Department of  
2 Geriatric Medicine before (pre-OGT) and after (post-OGT) implementation of outgoing geriatric team.

|                                           | <b>pre-OGT<br/>n=3,343</b> | <b>post-OGT<br/>n=2,434</b> | <b>p</b> |
|-------------------------------------------|----------------------------|-----------------------------|----------|
| Age, y, mean (SD)                         | 82.7 (8.8)                 | 83.1 (8.9)                  | 0.144    |
| Female, n (%)                             | 1,805 (54.0)               | 1,307 (53.7)                | 0.817    |
| Barthel Index, n (%)                      |                            |                             |          |
| 80-100                                    | 462 (13.8)                 | 303 (12.5)                  | 0.012    |
| 50-79                                     | 924 (27.6)                 | 655 (27.0)                  |          |
| 25-49                                     | 716 (21.4)                 | 600 (24.7)                  |          |
| 0-24                                      | 1,083 (32.4)               | 738 (30.3)                  |          |
| missing                                   | 158 (4.7)                  | 129 (5.6)                   |          |
| CCI, median [IQR]                         | 2 [1-4]                    | 2 [1-3]                     | 0.146    |
| CCI, n (%)                                |                            |                             |          |
| 0                                         | 682 (20.4)                 | 521 (21.4)                  | 0.450    |
| 1-2                                       | 1,233 (36.9)               | 911 (37.4)                  |          |
| ≥3                                        | 1,428 (42.7)               | 1,002 (41.2)                |          |
| LOS, days (index admission) median [IQR]  | 5.1 [3.1-7.9]              | 4.8 [2.9-6.9]               | 0.0001   |
| Died within 30 days after discharge n (%) | 360 (10.8)                 | 233 (9.6)                   | 0.139    |

3  
4 Abbreviations: SD standard deviation, CCI: Charlson Comorbidity Index, LOS: length of stay (in  
5 hospital), IQR: inter quartile range, OGT: outgoing geriatric team  
6

Does geriatric follow-up visits reduce hospital readmission among older patients discharged to temporary care at a skilled nursing facility - a before and after cohort study

## References

1. Clegg A, Young J, Iliffe S, et al. Frailty in elderly people. *Lancet* 2013;381(9868):752-62. doi: 10.1016/s0140-6736(12)62167-9 [published Online First: 2013/02/12]
2. Creditor MC. Hazards of hospitalization of the elderly. *Ann Intern Med* 1993;118(3):219-23. doi: 10.7326/0003-4819-118-3-199302010-00011 [published Online First: 1993/02/01]
3. Hubbard RE, Peel NM, Samanta M, et al. Frailty status at admission to hospital predicts multiple adverse outcomes. *Age Ageing* 2017;46(5):801-06. doi: 10.1093/ageing/afx081 [published Online First: 2017/05/23]
4. Yoo JW, Jabeen S, Bajwa T, Jr., et al. Hospital readmission of skilled nursing facility residents: a systematic review. *Res Gerontol Nurs* 2015;8(3):148-56. doi: 10.3928/19404921-20150129-01 [published Online First: 2015/02/25]
5. Moore AB, Krupp JE, Dufour AB, et al. Improving Transitions to Postacute Care for Elderly Patients Using a Novel Video-Conferencing Program: ECHO-Care Transitions. *Am J Med* 2017;130(10):1199-204. doi: 10.1016/j.amjmed.2017.04.041 [published Online First: 2017/05/30]
6. Kim LD, Kou L, Hu B, et al. Impact of a Connected Care Model on 30-Day Readmission Rates from Skilled Nursing Facilities. *J Hosp Med* 2017;12(4):238-44. doi: 10.12788/jhm.2710 [published Online First: 2017/04/16]
7. Fournaise A, Espensen N, Jakobsen S, et al. Increasing primary health-care services are associated with acute short-term hospitalization of Danes aged 70 years and older. *European Geriatric Medicine* 2017;8(5):435-39. doi: <https://doi.org/10.1016/j.eurger.2017.07.018>
8. Bahrmann A, Benner L, Christ M, et al. The Charlson Comorbidity and Barthel Index predict length of hospital stay, mortality, cardiovascular mortality and rehospitalization in unselected older patients admitted to the emergency department. *Aging Clin Exp Res* 2019;31(9):1233-42. doi: 10.1007/s40520-018-1067-x [published Online First: 2018/11/09]
9. Pedersen MK, Meyer G, Uhrenfeldt L. Risk factors for acute care hospital readmission in older persons in Western countries: a systematic review. *JBIC Database System Rev Implement Rep* 2017;15(2):454-85. doi: 10.11124/jbisrir-2016-003267 [published Online First: 2017/02/09]
10. Wang P, Wang Q, Li F, et al. Relationship Between Potentially Inappropriate Medications And The Risk Of Hospital Readmission And Death In Hospitalized Older Patients. *Clin Interv Aging* 2019;14:1871-78. doi: 10.2147/CIA.S218849 [published Online First: 2019/12/07]
11. Lembeck MA, Thygesen LC, Sorensen BD, et al. Effect of single follow-up home visit on readmission in a group of frail elderly patients - a Danish randomized clinical trial. *BMC Health Serv Res* 2019;19(1):751. doi: 10.1186/s12913-019-4528-9 [published Online First: 2019/10/28]
12. Lindegaard Pedersen J, Pedersen PU, Damsgaard EM. Nutritional Follow-Up after Discharge Prevents Readmission to Hospital - A Randomized Clinical Trial. *J Nutr Health Aging* 2017;21(1):75-82. doi: 10.1007/s12603-016-0745-7 [published Online First: 2016/12/22]
13. Lisby M, Klingenberg M, Ahrensberg JM, et al. Clinical impact of a comprehensive nurse-led discharge intervention on patients being discharged home from an acute medical unit: Randomised controlled trial. *Int J Nurs Stud* 2019;100:103411. doi: 10.1016/j.ijnurstu.2019.103411 [published Online First: 2019/10/20]
14. Thygesen LC, Fokdal S, Gjørup T, et al. Can municipality-based post-discharge follow-up visits including a general practitioner reduce early readmission among the fragile elderly (65+ years old)? A randomized controlled trial. *Scand J Prim Health Care* 2015;33(2):65-73. doi: 10.3109/02813432.2015.1041831 [published Online First: 2015/06/11]

Does geriatric follow-up visits reduce hospital readmission among older patients discharged to temporary care at a skilled nursing facility - a before and after cohort study

15. Finlayson K, Chang AM, Courtney MD, et al. Transitional care interventions reduce unplanned hospital readmissions in high-risk older adults. *BMC Health Serv Res* 2018;18(1):956. doi: 10.1186/s12913-018-3771-9 [published Online First: 2018/12/14]
16. Hansen LO, Young RS, Hinami K, et al. Interventions to reduce 30-day rehospitalization: a systematic review. *Ann Intern Med* 2011;155(8):520-8. doi: 10.7326/0003-4819-155-8-201110180-00008 [published Online First: 2011/10/19]
17. Renaudin P, Boyer L, Esteve MA, et al. Do pharmacist-led medication reviews in hospitals help reduce hospital readmissions? A systematic review and meta-analysis. *Br J Clin Pharmacol* 2016;82(6):1660-73. doi: 10.1111/bcp.13085 [published Online First: 2016/08/12]
18. Berkowitz RE, Fang Z, Helfand BK, et al. Project ReEngineered Discharge (RED) lowers hospital readmissions of patients discharged from a skilled nursing facility. *J Am Med Dir Assoc* 2013;14(10):736-40. doi: 10.1016/j.jamda.2013.03.004 [published Online First: 2013/04/24]
19. Zintchouk D, Gregersen M, Lauritzen T, et al. Geriatrician-performed comprehensive geriatric care in older adults referred to an outpatient community rehabilitation unit: A randomized controlled trial. *Eur J Intern Med* 2018;51:18-24. doi: 10.1016/j.ejim.2018.01.022 [published Online First: 2018/02/06]
20. Vrangbaek K. Denmark. In: Tikkanen R, Osborn R, Mossialos E, et al., eds. *International Health Care System Profiles: The Commonwealth Fund 2020*.
21. Esbjerg municipality, Copenhagen municipality, Aarhus municipality, et al. The 6-cities key figures 2019 [6-by nøgletal 2019] 2019 [cited 2020 20. september]. Available from: <https://www.odense.dk/om-kommunen/statistikker-og-regnskaber/odense-i-tal/6-by-nogletal>.
22. authorities TDh. Description of indicators - national aim [Beskrivelse af indikatorer - de nationale mål]. 2016
23. Matzen LE, Jepsen DB, Ryg J, et al. Functional level at admission is a predictor of survival in older patients admitted to an acute geriatric unit. *BMC Geriatr* 2012;12:32. doi: 10.1186/1471-2318-12-32 [published Online First: 2012/06/27]
24. Thygesen SK, Christiansen CF, Christensen S, et al. The predictive value of ICD-10 diagnostic coding used to assess Charlson comorbidity index conditions in the population-based Danish National Registry of Patients. *BMC Med Res Methodol* 2011;11:83. doi: 10.1186/1471-2288-11-83 [published Online First: 2011/05/31]
25. Vandembroucke JP, von Elm E, Altman DG, et al. Strengthening the Reporting of Observational Studies in Epidemiology (STROBE): explanation and elaboration. *Int J Surg* 2014;12(12):1500-24. doi: 10.1016/j.ijso.2014.07.014 [published Online First: 2014/07/22]
26. National Committee on Health Research Ethics. What to notify? 2020 [Available from: <https://en.nvk.dk/how-to-notify/what-to-notify> accessed 15th of May 2020.
27. The Danish Health Authority. Health agreements 2020 [cited 2020 June 6th]. Available from: <https://www.esundhed.dk/home/emner/patienter%20og%20sygehuse/sundhedsaftaler> accessed June 6 2020.
28. Burke RE, Whitfield EA, Hittle D, et al. Hospital Readmission From Post-Acute Care Facilities: Risk Factors, Timing, and Outcomes. *J Am Med Dir Assoc* 2016;17(3):249-55. doi: 10.1016/j.jamda.2015.11.005 [published Online First: 2015/12/31]
29. Kristensen SR, Bech M, Quentin W. A roadmap for comparing readmission policies with application to Denmark, England, Germany and the United States. *Health Policy* 2015;119(3):264-73. doi: 10.1016/j.healthpol.2014.12.009 [published Online First: 2014/12/31]
30. European Observatory on Health Systems and Policies (OECD and WHO). *State of Health in the EU, Denmark, Country Health Profile 2019, 2019*.

Does geriatric follow-up visits reduce hospital readmission among older patients discharged to temporary care at a skilled nursing facility - a before and after cohort study

- 1  
2  
3  
4 1 31. Ryg J, Engberg H, Mariadas P, et al. Barthel Index at hospital admission is associated  
5 2 with mortality in geriatric patients: a Danish nationwide population-based cohort  
6 3 study. *Clin Epidemiol* 2018;10:1789-800. doi: 10.2147/clep.S176035 [published  
7 4 Online First: 2018/12/21]  
8 5 32. Danish Clinical Quality Program [Regionernes Kliniske Kvalitetsudviklingsprogram].  
9 6 Annual report for the Danish national Geriatric Database, 2019 [Årsrapport for den  
10 7 landsdækkende database for geriatri, 2019] 2019 [cited 2020 15 september].  
11 8 Available from:  
12 9 [https://www.sundhed.dk/content/cms/9/4709\\_geriatri\\_aarsrapport2019\\_endelig\\_anon](https://www.sundhed.dk/content/cms/9/4709_geriatri_aarsrapport2019_endelig_anonymiseret.pdf)  
13 10 [ymiseret.pdf](https://www.sundhed.dk/content/cms/9/4709_geriatri_aarsrapport2019_endelig_anonymiseret.pdf) accessed 22. sept. 2020.  
14 11 33. William R. Shaddish TDC, Donald T. Campbell. Experimental and Quasi-Experimental  
15 12 Designs for Generalized Causal Inference 2nd Edition. 2 edition ed2001.  
16 13

For peer review only

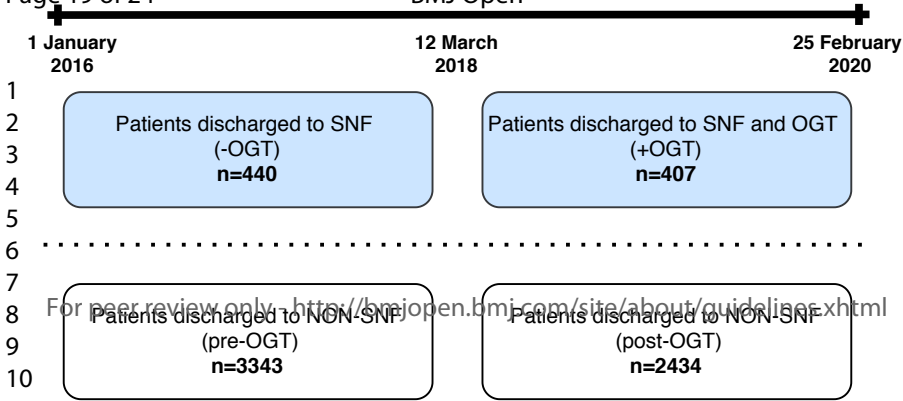

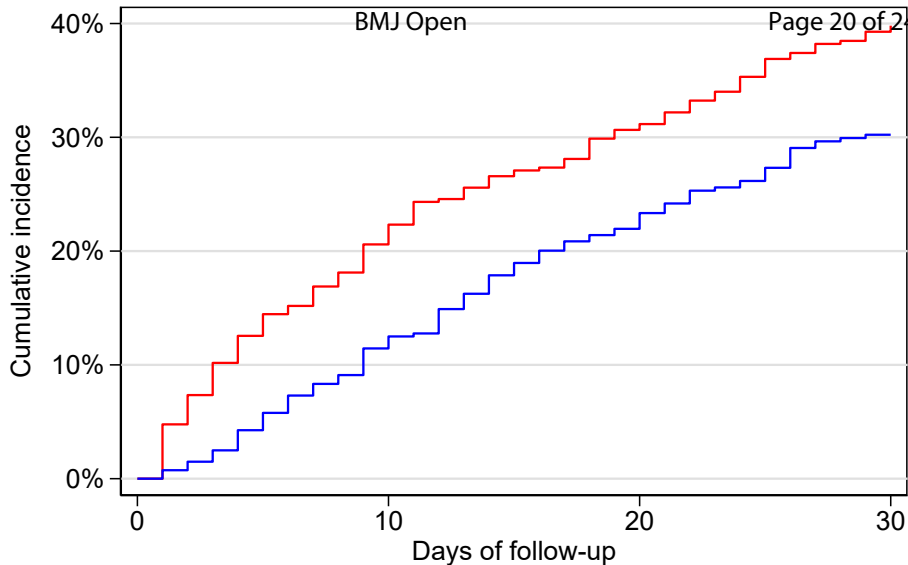

Number at risk

-OGT 440

320

271

227

+OGT 403

337

282

239

For peer review only - <http://bmjopen.bmj.com/site/about/guidelines.xhtml>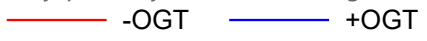

Cumulative incidence

30%  
20%  
10%  
0%

0

10

20

30

Days of follow-up

Number at risk

pre-OGT 3341

2584

2238

2030

post-OGT 2425

1980

1761

1600

For peer review only - <http://bmjopen.bmj.com/site/about/guidelines.xhtml>

—

pre-OGT

—

post-OGT

1  
2  
3  
4  
5  
6  
7  
8  
9  
10  
11  
12  
13  
14  
15  
16  
17  
18  
19  
20

# Reporting checklist for quality improvement in health care.

Based on the SQUIRE guidelines.

## Instructions to authors

Complete this checklist by entering the page numbers from your manuscript where readers will find each of the items listed below.

Your article may not currently address all the items on the checklist. Please modify your text to include the missing information. If you are certain that an item does not apply, please write "n/a" and provide a short explanation.

Upload your completed checklist as an extra file when you submit to a journal.

In your methods section, say that you used the SQUIRE reporting guidelines, and cite them as:

Ogrinc G, Davies L, Goodman D, Batalden P, Davidoff F, Stevens D. SQUIRE 2.0 (Standards for Quality Improvement Reporting Excellence): revised publication guidelines from a detailed consensus process

|                     | Reporting Item                                                                                                                                                                                                                                      | Page Number |
|---------------------|-----------------------------------------------------------------------------------------------------------------------------------------------------------------------------------------------------------------------------------------------------|-------------|
| <b>Title</b>        |                                                                                                                                                                                                                                                     |             |
|                     | <a href="#">#1</a> Indicate that the manuscript concerns an initiative to improve healthcare (broadly defined to include the quality, safety, effectiveness, patientcenteredness, timeliness, cost, efficiency, and equity of healthcare)           | 1           |
| <b>Abstract</b>     |                                                                                                                                                                                                                                                     |             |
|                     | <a href="#">#02a</a> Provide adequate information to aid in searching and indexing                                                                                                                                                                  | 3           |
|                     | <a href="#">#02b</a> Summarize all key information from various sections of the text using the abstract format of the intended publication or a structured summary such as: background, local problem, methods, interventions, results, conclusions | 2           |
| <b>Introduction</b> |                                                                                                                                                                                                                                                     |             |
| Problem             | <a href="#">#3</a> Nature and significance of the local problem                                                                                                                                                                                     | 4           |



1 description

2 Available [#4](#) Summary of what is currently known about the problem, including 4  
3 knowledge relevant previous studies

4 Rationale [#5](#) Informal or formal frameworks, models, concepts, and / or theories used 4  
5 to explain the problem, any reasons or assumptions that were used to  
6 develop the intervention(s), and reasons why the intervention(s) was  
7 expected to work

8 Specific aims [#6](#) Purpose of the project and of this report 4

9 **Methods**

10 Context [#7](#) Contextual elements considered important at the outset of introducing 4  
11 the intervention(s)

12 Intervention(s) [#08a](#) Description of the intervention(s) in sufficient detail that others could 5  
13 reproduce it

14 Intervention(s) [#08b](#) Specifics of the team involved in the work 5

15 Study of the [#09a](#) Approach chosen for assessing the impact of the intervention(s) 6  
16 Intervention(s)

17 Study of the [#09b](#) Approach used to establish whether the observed outcomes were due to 6  
18 Intervention(s) the intervention(s)

19 Measures [#10a](#) Measures chosen for studying processes and outcomes of the 5-6  
20 intervention(s), including rationale for choosing them, their operational  
21 definitions, and their validity and reliability

22 Measures [#10b](#) Description of the approach to the ongoing assessment of contextual 5-6  
23 elements that contributed to the success, failure, efficiency, and cost

24 Measures [#10c](#) Methods employed for assessing completeness and accuracy of data 5-6

25 Analysis [#11a](#) Qualitative and quantitative methods used to draw inferences from the 6  
26 data

27 Analysis [#11b](#) Methods for understanding variation within the data, including the 6  
28 effects of time as a variable

29 Ethical [#12](#) Ethical aspects of implementing and studying the intervention(s) and 7  
30 considerations how they were addressed, including, but not limited to, formal ethics  
31 review and potential conflict(s) of interest

## Results

|  |                      |                                                                                                                                                                                         |     |
|--|----------------------|-----------------------------------------------------------------------------------------------------------------------------------------------------------------------------------------|-----|
|  | <a href="#">#13a</a> | Initial steps of the intervention(s) and their evolution over time (e.g., time-line diagram, flow chart, or table), including modifications made to the intervention during the project | 7-8 |
|  | <a href="#">#13b</a> | Details of the process measures and outcome                                                                                                                                             | 7-8 |
|  | <a href="#">#13c</a> | Contextual elements that interacted with the intervention(s)                                                                                                                            | 7-8 |
|  | <a href="#">#13d</a> | Observed associations between outcomes, interventions, and relevant contextual elements                                                                                                 | 7-8 |
|  | <a href="#">#13e</a> | Unintended consequences such as unexpected benefits, problems, failures, or costs associated with the intervention(s).                                                                  | 7-8 |
|  | <a href="#">#13f</a> | Details about missing data                                                                                                                                                              | 7-8 |

## Discussion

|                |                      |                                                                                                                                              |      |
|----------------|----------------------|----------------------------------------------------------------------------------------------------------------------------------------------|------|
| Summary        | <a href="#">#14a</a> | Key findings, including relevance to the rationale and specific aims                                                                         | 8-10 |
| Summary        | <a href="#">#14b</a> | Particular strengths of the project                                                                                                          | 9    |
| Interpretation | <a href="#">#15a</a> | Nature of the association between the intervention(s) and the outcomes                                                                       | 8-10 |
| Interpretation | <a href="#">#15b</a> | Comparison of results with findings from other publications                                                                                  | 8-10 |
| Interpretation | <a href="#">#15c</a> | Impact of the project on people and systems                                                                                                  | 10   |
| Interpretation | <a href="#">#15d</a> | Reasons for any differences between observed and anticipated outcomes, including the influence of context                                    | 9    |
| Interpretation | <a href="#">#15e</a> | Costs and strategic trade-offs, including opportunity costs                                                                                  | 10   |
| Limitations    | <a href="#">#16a</a> | Limits to the generalizability of the work                                                                                                   | 9-10 |
| Limitations    | <a href="#">#16b</a> | Factors that might have limited internal validity such as confounding, bias, or imprecision in the design, methods, measurement, or analysis | 9-10 |
| Limitations    | <a href="#">#16c</a> | Efforts made to minimize and adjust for limitations                                                                                          | 9-10 |
| Conclusion     | <a href="#">#17a</a> | Usefulness of the work                                                                                                                       | 10   |
| Conclusion     | <a href="#">#17b</a> | Sustainability                                                                                                                               | 10   |
| Conclusion     | <a href="#">#17c</a> | Potential for spread to other contexts                                                                                                       | 10   |

|    |                    |                      |                                                                                                                                                     |    |
|----|--------------------|----------------------|-----------------------------------------------------------------------------------------------------------------------------------------------------|----|
| 1  | Conclusion         | <a href="#">#17d</a> | Implications for practice and for further study in the field                                                                                        | 10 |
| 2  |                    |                      |                                                                                                                                                     |    |
| 3  | Conclusion         | <a href="#">#17e</a> | Suggested next steps                                                                                                                                | 10 |
| 4  |                    |                      |                                                                                                                                                     |    |
| 5  |                    |                      |                                                                                                                                                     |    |
| 6  | <b>Other</b>       |                      |                                                                                                                                                     |    |
| 7  | <b>information</b> |                      |                                                                                                                                                     |    |
| 8  |                    |                      |                                                                                                                                                     |    |
| 9  | Funding            | <a href="#">#18</a>  | Sources of funding that supported this work. Role, if any, of the funding organization in the design, implementation, interpretation, and reporting | 10 |
| 10 |                    |                      |                                                                                                                                                     |    |
| 11 |                    |                      |                                                                                                                                                     |    |
| 12 |                    |                      |                                                                                                                                                     |    |

13 The SQUIRE 2.0 checklist is distributed under the terms of the Creative Commons Attribution License CC BY-  
14 NC 4.0. This checklist was completed on 06. November 2020 using <https://www.goodreports.org/>, a tool made  
15 by the [EQUATOR Network](#) in collaboration with [Penelope.ai](#)  
16  
17  
18  
19  
20  
21  
22  
23  
24  
25  
26  
27  
28  
29  
30  
31  
32  
33  
34  
35  
36  
37  
38  
39  
40  
41  
42  
43  
44  
45  
46  
47  
48  
49  
50  
51  
52  
53  
54  
55  
56  
57  
58  
59  
60

# BMJ Open

## Does geriatric follow-up visits reduce hospital readmission among older patients discharged to temporary care at a skilled nursing facility – a before and after cohort study

|                                 |                                                                                                                                                                                                                                                                                                                                                                                                                                                                                                                                                                                                                                                                                                                                                                                                                                                                   |
|---------------------------------|-------------------------------------------------------------------------------------------------------------------------------------------------------------------------------------------------------------------------------------------------------------------------------------------------------------------------------------------------------------------------------------------------------------------------------------------------------------------------------------------------------------------------------------------------------------------------------------------------------------------------------------------------------------------------------------------------------------------------------------------------------------------------------------------------------------------------------------------------------------------|
| Journal:                        | <i>BMJ Open</i>                                                                                                                                                                                                                                                                                                                                                                                                                                                                                                                                                                                                                                                                                                                                                                                                                                                   |
| Manuscript ID                   | bmjopen-2020-046698.R1                                                                                                                                                                                                                                                                                                                                                                                                                                                                                                                                                                                                                                                                                                                                                                                                                                            |
| Article Type:                   | Original research                                                                                                                                                                                                                                                                                                                                                                                                                                                                                                                                                                                                                                                                                                                                                                                                                                                 |
| Date Submitted by the Author:   | 17-Apr-2021                                                                                                                                                                                                                                                                                                                                                                                                                                                                                                                                                                                                                                                                                                                                                                                                                                                       |
| Complete List of Authors:       | Thomsen , Katja ; University of Southern Denmark, Geriatric Research Unit, Department of Clinical Research; Odense University Hospital, Department of Geriatric Medicine<br>Fournaise, Anders; Odense University Hospital, Department of Geriatric Medicine; Region of Southern Denmark, Department of Cross-sectoral Collaboration<br>Matzen, Lars; Odense University Hospital, Department of Geriatric Medicine; University of Southern Denmark, Geriatric Research Unit, Department of Clinical Research<br>Andersen-Ranberg, Karen; University of Southern Denmark, Department of Public Health; Odense University Hospital, Geriatric Research Unit, Department of Clinical Research<br>Ryg, Jesper; Odense Universitetshospital, Department of Geriatric Medicine; University of Southern Denmark, Geriatric Research Unit, Department of Clinical Research |
| <b>Primary Subject Heading</b>: | Geriatric medicine                                                                                                                                                                                                                                                                                                                                                                                                                                                                                                                                                                                                                                                                                                                                                                                                                                                |
| Secondary Subject Heading:      | Public health, Rehabilitation medicine                                                                                                                                                                                                                                                                                                                                                                                                                                                                                                                                                                                                                                                                                                                                                                                                                            |
| Keywords:                       | GERIATRIC MEDICINE, INTERNAL MEDICINE, Rehabilitation medicine < INTERNAL MEDICINE                                                                                                                                                                                                                                                                                                                                                                                                                                                                                                                                                                                                                                                                                                                                                                                |
|                                 |                                                                                                                                                                                                                                                                                                                                                                                                                                                                                                                                                                                                                                                                                                                                                                                                                                                                   |

SCHOLARONE™  
Manuscripts

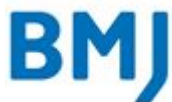

I, the Submitting Author has the right to grant and does grant on behalf of all authors of the Work (as defined in the below author licence), an exclusive licence and/or a non-exclusive licence for contributions from authors who are: i) UK Crown employees; ii) where BMJ has agreed a CC-BY licence shall apply, and/or iii) in accordance with the terms applicable for US Federal Government officers or employees acting as part of their official duties; on a worldwide, perpetual, irrevocable, royalty-free basis to BMJ Publishing Group Ltd ("BMJ") its licensees and where the relevant Journal is co-owned by BMJ to the co-owners of the Journal, to publish the Work in this journal and any other BMJ products and to exploit all rights, as set out in our [licence](#).

The Submitting Author accepts and understands that any supply made under these terms is made by BMJ to the Submitting Author unless you are acting as an employee on behalf of your employer or a postgraduate student of an affiliated institution which is paying any applicable article publishing charge ("APC") for Open Access articles. Where the Submitting Author wishes to make the Work available on an Open Access basis (and intends to pay the relevant APC), the terms of reuse of such Open Access shall be governed by a Creative Commons licence – details of these licences and which [Creative Commons](#) licence will apply to this Work are set out in our licence referred to above.

Other than as permitted in any relevant BMJ Author's Self Archiving Policies, I confirm this Work has not been accepted for publication elsewhere, is not being considered for publication elsewhere and does not duplicate material already published. I confirm all authors consent to publication of this Work and authorise the granting of this licence.

*Does geriatric follow-up visits reduce hospital readmission among older patients discharged to temporary care at a skilled nursing facility - a before and after cohort study*

1  
2  
3  
4 1 Title page

5 2

6 3 **Does geriatric follow-up visits reduce hospital readmission among older patients discharged**  
7 **to temporary care at a skilled nursing facility – a before and after cohort study**

8 4  
9 5

10 6 \*Katja Thomsen (ORCID - 0000-0002-0454-836X)<sup>1,4</sup>, \*Anders Fournaise (ORCID - 0000-0002-4754-  
11 7 7500)<sup>1,2,3,4</sup>, Lars Matzen (ORCID - 0000-0003-3706-8554)<sup>1,4</sup>, Karen Andersen-Ranberg (ORCID -  
12 8 0000-0003-1970-7076)<sup>1,3,4</sup>, Jesper Ryg (ORCID - 0000-0002-8641-3062)<sup>1,4</sup>

13 9 \*co-first authors

14 10

15 11 <sup>1</sup> Department of Geriatric Medicine, Odense University Hospital, Odense, Denmark

16 12 <sup>2</sup> Department of Cross-sectoral Collaboration, Region of Southern Denmark, Vejle, Denmark

17 13 <sup>3</sup> Epidemiology, Biostatistics and Biodemography, Department of Public Health, University of Southern  
18 14 Denmark, Odense, Denmark

19 15 <sup>4</sup> Geriatric Research Unit, Department of Clinical Research, University of Southern Denmark, Odense,  
20 16 Denmark

21 17

#### 22 18 **Corresponding author**

23 19 Katja Thomsen, Department of Geriatric Medicine, Odense University Hospital, J. B. Winsløws Vej 4,  
24 20 DK-5000 Odense C. E-mail: katja.thomsen@rsyd.dk / 0045 6541 4605

25 21  
26  
27  
28  
29  
30  
31  
32  
33  
34  
35  
36  
37  
38  
39  
40  
41  
42  
43  
44  
45  
46  
47  
48  
49  
50  
51  
52  
53  
54  
55  
56  
57  
58  
59  
60

*Does geriatric follow-up visits reduce hospital readmission among older patients discharged to temporary care at a skilled nursing facility - a before and after cohort study*

## 1 **Abstract**

### 2 **Introduction**

3 Hospital readmission is a burden to patients, relatives, and society. Older patients with frailty are at  
4 highest risk of readmission and its negative outcomes.

### 5 **Objective**

6 We aimed at examining whether follow-up visits by an outgoing multidisciplinary geriatric team (OGT)  
7 reduces unplanned hospital readmission in patients discharged to a skilled nursing facility (SNF).

### 8 **Design**

9 A retrospective single-centre before and after cohort study.

### 10 **Setting and participants**

11 Study population included all hospitalised patients discharged from a Danish geriatric department to a  
12 SNF during 1 January 2016 – 25 February 2020. To address potential changes in discharge and  
13 readmission patterns during the study period, patients discharged from the same geriatric department  
14 to own home were also assessed.

### 15 **Intervention**

16 OGT visits at SNF within seven days following discharge. Patients discharged to SNF before 12  
17 March 2018 did not receive OGT (-OGT). Patients discharged to SNF on or after 12 March 2018  
18 received the intervention (+OGT).

### 19 **Main outcome measures**

20 Unplanned hospital readmission between 4 hours and 30 days following initial discharge.

### 21 **Results**

22 Totally 847 patients were included (440 -OGT; 407 +OGT). No differences were seen between the  
23 two groups regarding age, sex, activities of daily living (ADL), Charlson Comorbidity Index (CCI), or  
24 30-day mortality. The cumulative incidence of readmission was 39.8% (95% CI 35.2-44.8, n=162) in -  
25 OGT and 30.2% (95% CI 25.8-35.2, n=113) in +OGT. The unadjusted risk (HR (95% CI)) of  
26 readmission was 0.68 (0.54-0.87, p=0.002) in +OGT compared to -OGT, and remained significantly  
27 lower (0.72 (0.57-0.93, p=0.011)) adjusting for age, length of stay, sex, ADL, and CCI. For patients  
28 discharged to own home the risk of readmission remained unchanged during the study period.

### 29 **Conclusion**

30 Follow-up visits by OGT to patients discharged to temporary care at a SNF significantly reduced 30-  
31 day readmission in older patients.

### 33 **Trail registration**

34 Danish Data Protection Agency (rec.no. 20/1681).

35

Does geriatric follow-up visits reduce hospital readmission among older patients discharged to temporary care at a skilled nursing facility - a before and after cohort study

#### Strengths and limitations of this study

- This was a hospital-based before and after cohort study with no patients lost to follow-up
- We accounted for the competing risk of death and adjusted for potential confounders in our analysis (age, sex, activities of daily living, comorbidity, and length of stay)
- We explored general changes in readmission pattern not related to the intervention
- This was a before and after cohort study, which has a risk of overestimating the effect
- This was a single centre study, which may limit the generalisability of study results

#### Keywords

Readmission, Follow-up visit, Outgoing team, Geriatrics, Older people, Integrated care

#### Word count

3930 words



*Does geriatric follow-up visits reduce hospital readmission among older patients discharged to temporary care at a skilled nursing facility - a before and after cohort study*

## 1 Introduction

2 Acute hospitalisation can be lifesaving but may also lead to adverse health outcomes in older adults,  
3 such as hospital-acquired infections and poorer functional health, as well as anxiety and distress <sup>1-7</sup>.

4 Some acute hospitalisations are preventable, and particularly readmissions are therefore in focus for  
5 preventive initiatives. Readmission risk increases with age, especially in patients characterised by  
6 multimorbidity, polypharmacy, longer in-hospital stay, lower functional status, male sex, and prior  
7 hospitalisation <sup>8-10</sup>. After an acute treatment, such vulnerable patients may be transferred to a post-  
8 acute care facility for further stabilisation of medical and functional health, either in a hospital or in a  
9 skilled nursing facility (SNF), which offers temporary stays. SNF is an in-patient rehabilitation centre  
10 staffed with nurses and allied health professionals, while medical attention is carried out by a primary  
11 care physician.

12 Interventions to prevent readmission among older adults are widely studied. Several models have  
13 been investigated; involving various staff groups (i.e. pharmacist, nurse, primary care physician, and  
14 geriatrician) and different point of actions (i.e. nutrition, medication, exercise, care) <sup>11-14</sup>, but no single  
15 or a bundle of interventions appear to reduce hospital readmission reliably <sup>15-17</sup>. For patients  
16 discharged to a SNF, only few intervention studies exist <sup>4-6 18-20</sup>, mainly from countries with a mixture  
17 of public and private health care providers.

18 Our aim was to examine whether early follow-up visits by an outgoing multidisciplinary (nurse and  
19 doctor) geriatric team (OGT) reduce acute hospital readmission in older vulnerable patients  
20 discharged to a temporary stay in a SNF.

## 21 Methods

### 22 *Design*

23 We conducted a retrospective single-centre, before and after cohort study, following the  
24 implementation of an OGT at a SNF in the municipality of Odense, Denmark.

### 26 *Settings*

27 In Denmark, all citizens have free access to their primary care physician, hospital treatment, and  
28 health care services including home care due to a tax-funded public health care system. Hospital  
29 treatment is provided by five regions, who also are responsible for financing primary care physicians  
30 and specialist physicians, while 98 municipalities are responsible for providing home care, social care,  
31 rehabilitation, and health promotion as well as permanent and temporary care at SNF <sup>21</sup>.

32  
33 Odense University Hospital is a highly specialised hospital serving citizens in the Region of Southern  
34 Denmark. It is the main hospital for the citizens of Odense municipality with approximately 200,000  
35 inhabitants, of which 17% are above 65 years of age <sup>22</sup>. The Department of Geriatric Medicine at  
36 Odense University Hospital consists of a medical ward with 38 beds. All patients are admitted as

*Does geriatric follow-up visits reduce hospital readmission among older patients discharged to temporary care at a skilled nursing facility - a before and after cohort study*

1 acute patients from the emergency department or transferred from other departments, and are  
2 characterised by acute medical illness, high age, multimorbidity, polypharmacy, and functional  
3 decline. Occasionally, the department treats patients with planned admissions e.g. preparation for  
4 colposcopy. All other planned treatments are conducted as ambulant care in the department's  
5 outpatient clinical, only 0.5% were planned admissions during study period. The department has a  
6 close collaboration with Odense Municipality, which is responsible for providing home- and nursing  
7 care services for patients after hospital discharge <sup>21</sup>. Most patients (87%) are discharged to the same  
8 residence they had before admission. Patients admitted to hospital from their own home, who at the  
9 time of discharge are in need of substantial care and rehabilitation can be recommended by the  
10 hospital to be discharged to a municipal SNF for temporary care and rehabilitation. However, the  
11 municipality decides whether the recommendation should be complied with or the patients should be  
12 cared for in their own home.  
13 Odense municipality has organized their SNF in one facility hosting 64 temporary beds located seven  
14 kilometres from Odense University Hospital. The SNF has a turnover of approximately 1,000 patients  
15 a year with an average length of stay of 24 days (unpublished administrative data). The SNF staff  
16 includes nurses, social and healthcare assistants, physiotherapists, and occupational therapist, but  
17 there is no staff physician. If a patient needs medical attention, the SNF staff contacts the patient's  
18 personal primary care physician.

19  
20 *Intervention*

21  
22 The OGT was developed as part of a quality assurance project at Odense University  
23 Hospital aiming at reducing unnecessary readmissions among older citizens. The personnel  
24 did not follow a prespecified protocol. However, medical staff at the Department of Geriatric  
25 Medicine and the personnel at the SNF developed a co-operation agreement specifying the  
26 scope of the OGT-visit, mutual responsibilities in the cooperation, and which medical issues  
27 to handle during the OGT-visit.

28  
29 The OGT was initiated 12 March 2018. It consisted of a geriatric nurse and a specialist geriatrician,  
30 who in close collaboration with the patient, and the SNF-staff dealt with any health issues related to  
31 the recent hospital admission and discharge i.e. effect and adverse effects of initiated treatment,  
32 nutritional and rehabilitation issues, and any uncertainties of the discharge summary. The OGT  
33 consulted patients at the SNF within seven days following hospital discharge. The OGT had access to  
34 the patients' electronic hospital records, including records from physicians, nurses, occupational- and  
35 physiotherapists, and an updated list of medications. Moreover, venous blood samples, urine, and  
36 stool samples could be collected by the OGT for analyses at the hospital. The SNF-staff was  
37 instructed to closely read the hospital discharge summary, to pay a special attention to effect and  
38 potential adverse effect of initiated treatment, and to nutritional and to rehabilitation issues. Moreover,  
39 it was required that blood pressure, pulse, temperature, and blood oxygen saturation were measured

*Does geriatric follow-up visits reduce hospital readmission among older patients discharged to temporary care at a skilled nursing facility - a before and after cohort study*

1 ahead of OGT visits. The OGT visited the SNF three times a week, totally six hours per week.

2 Patients received at least one OGT visit from the OGT during the follow-up.

3  
4  
5  
6  
7  
8 **4** *Participants*

9 We included all patients discharged from the Department of Geriatric Medicine at Odense University  
10 Hospital from 1 January 2016 to 25 February 2020. Eligible patients were identified from Odense  
11 University Hospital's patient administrative system and the Odense municipality's electronic care  
12 journal. Patients discharged to SNF (SNF patients) before and after initiation of OGT 12 March 2018  
13 were categorized as -OGT and as +OGT, respectively. To explore time trends and potential  
14 variations in discharge, readmission patterns, and patient characteristics during the study period, we  
15 categorized patients discharged to own home (non-SNF patients) before and after 12 March 2018 as  
16 pre-OGT and post-OGT, respectively.  
17  
18  
19  
20  
21  
22

23 **14** *Variables and Data Sources*

24 The primary outcome was 30-days readmission rate. Readmission was defined as any  
25 acute/unplanned hospital admission within 4 hours and 30 days after discharge from the Department  
26 of Geriatric Medicine<sup>23</sup>. Index-admission was defined as any unplanned admission to the Department  
27 of Geriatric Medicine during the study period. Patients with several hospital admissions could have  
28 several index admissions but only one readmission per index admission. Thus, each unplanned  
29 admission to the geriatric department counted as an index admission.

30 We used the patient's unique civil registration code to extract data from Odense University Hospitals  
31 patient administrative system for each index admission. Data included information of unplanned  
32 hospital admissions, date and time of the admission and discharge, location, type, and hospital  
33 department. Length of index admissions and readmissions were derived from medical records.  
34 Participants' characteristics e.g. age, sex, and information on mortality were obtained from the Civil  
35 Registration System. Information of comorbidity and Barthel index (BI) were obtained from Odense  
36 University Hospitals patient administrative system or directly from medical records when missing in  
37 the register (n=59). BI is a measure of function in activity of daily living (ADL), with a sum score  
38 across ten domains of ADL. BI is the official ADL tool used in Danish hospitals and assessed routinely  
39 upon hospital admission<sup>24</sup>. The total score ranges from 0 (completely dependent) to 100 (completely  
40 independent). In Denmark BI is categorized in four standard ICD-10 diagnostic categories BI=80-100  
41 (independent ADL), BI=50-79 (moderate reduced ADL), BI=25-49 (low ADL), and BI=0-24 (very low  
42 ADL). The burden of comorbidity was assessed using Charlson Comorbidity Index (CCI), which was  
43 computed based on all primary and secondary discharge diagnoses registered in the hospital's  
44 electronic patient journal the past four years. The CCI score was divided into three levels: low (score  
45 of 0), moderate (score of 1-2), and high (score of  $\geq 3$ )<sup>25</sup>.

46 The health-interventions by the OGT were registered in an administrative database without any  
47 personally identifiable data. This database provided summary data of the interventions made by the  
48 OGT (i.e. adjustments of medication, blood samples, nutritional advice, information of  
49  
50  
51  
52  
53  
54  
55  
56  
57  
58  
59  
60

*Does geriatric follow-up visits reduce hospital readmission among older patients discharged to temporary care at a skilled nursing facility - a before and after cohort study*

1 tests/examinations, and intervention from a specialised acute nursing function). Data of number of  
2 OGT-visits per patient were extracted from the patient administrative system.

3  
4  
5  
6  
7  
8 **Statistical Analysis**

9 The study sample size was calculated from expected change in readmission rate 'before and after'.  
10 The inclusion of 367 patients in each group would give the study 80% power to detect a 30%  
11 reduction in readmission rate assuming a baseline readmission rate of 30%<sup>19</sup>, with a level of  
12 significance of 5%. This power calculation was used to define the length of the study period in order to  
13 ensure an adequate sample size. Patient characteristics were reported using numbers/percentages,  
14 means (SD), and medians [IQR]. Differences between groups were calculated using chi<sup>2</sup> tests,  
15 Student's *t*-test, or Kruskal-Wallis test, as appropriate. The primary outcome, readmission rate, was  
16 calculated as the total number of 30 days readmissions divided by total number of index admissions.  
17 A statistical process control chart plot was created plotting monthly readmission rates over the entire  
18 study period. A Cox proportional hazard model for readmission within 30 days was used to investigate  
19 the effect of the OGT. Patients who died or moved to another municipality within 30 days after  
20 discharge were censored from analysis and the model was adjusted for age, length of stay (LOS),  
21 sex, CCI, and BI. The incidence of readmission was plotted as a function of time in a Kaplan-Meier  
plot of cumulative incidence. The analysis did not include patients with a follow-up of less than 12  
hours. The proportional-hazard assumption was tested using Schoenfeld residuals. The statistical  
significance threshold for all tests was set to  $P < 0.05$ . STATA software version 16 (StataCorp LLC,  
Texas, USA) was used for statistical analysis.

*Does geriatric follow-up visits reduce hospital readmission among older patients discharged to temporary care at a skilled nursing facility - a before and after cohort study*

1  
2  
3  
4 1 **Ethics**

5 2 The study was approved by the Danish Data Protection Agency (rec. no. 20/1681) and reported  
6 3 according to STROBE (Strengthening the Reporting of Observational Studies in Epidemiology)  
7 4 guidelines<sup>26</sup>. Approval by ethical committee and informed consent was not necessary according to  
8 5 Danish legislation on medical ethics due to the register-based study design<sup>27</sup>.  
9 6

10 7 **Results**

11 8 Totally, 6,624 patients (54.1% women) were discharged from the Department of Geriatric Medicine  
12 9 during the study period with a mean (SD) age of 83.0 (8.8) years. Of these, 847 patients (women  
13 10 56.1%) with a mean (SD) age 84.2 (8.3) years were discharged to the SNF (-OGT: n=440 and +OGT:  
14 11 n=407) (Table 1), whereas 5,777 patients (women 53.8%) with a mean (SD) age of 82.9 (8.8) (pre-  
15 12 OGT=3,343 and post-OGT=2,434) were discharged to their own home (non-SNF) (figure 1).  
16 13 Proportion of patients with >1 index-admission was 58% (range 1-13).  
17 14

18 15 *Characteristics and outcome data for SNF patients (-OGT and +OGT) (n=847)*

19 16 No difference was found between -OGT (n=440) and +OGT (n=407) regarding age, sex, BI, CCI, and  
20 17 30-days mortality. Median [IQR] LOS of index-admission was 7.8 [5.0-12.8] days and 6.0 [3.9-10.0]  
21 18 days in -OGT and +OGT, respectively (p≤0.0001) (Table 1). The median number of OGT visits pr.  
22 19 patient was 1 ([IQR 1-2] range 1-10). The proportion of patients visited more than once was 38%. In  
23 20 32% of the visits the patients had adjustments to their medication, 14% had blood samples taken,  
24 21 12% were given nutritional advice, 5% were informed of tests-results (i.e. x-ray, endoscopy), and 6%  
25 22 received intervention from a specialised municipal acute nursing function.  
26 23

27 24 The 30-days readmission rate declined from start of intervention from 36.8% (n=162) in -OGT to  
28 25 27.8% (n=113) in +OGT group (p=0.005) (figure 2). The cumulative incidence of readmission (95%  
29 26 CI) was 39.8% (35.2-44.8) in the -OGT group and 30.2% (25.8-35.2) in +OGT group (figure 3).  
30 27 Unadjusted risk (HR (95% CI)) of readmission was 0.68 (0.54-0.87, p=0.002) in the +OGT group  
31 28 compared to the -OGT group. Risk of readmission remained lower in the +OGT group in the fully  
32 29 adjusted model (0.72 (0.57-0.93), p=0.011). Subgroup analysis defining readmission as an unplanned  
33 30 hospital contact with a duration of 12+ hours, occurring between 4 hours and 30 days after discharge  
34 31 from the Department of Geriatric Medicine did not change the results (data not shown).  
35 32

36 32 Patients had a wide spectrum of primary diagnoses at index admission and readmission with no  
37 33 difference between the two groups in regards of proportions within each ICD-10 groups (Chi<sup>2</sup>). The  
38 34 three most common ICD-10 groups were diseases of the respiratory organs (ICD10: J00-J99) (-OGT:  
39 35 27% and +OGT: 22%, p=0.127); endocrine, nutritional, and metabolic diseases (ICD10: E00-E90) (-  
40 36 OGT: 10% and +OGT: 12%, p=0.271); and certain infectious and parasitic diseases (ICD10: A00-  
41 37 B99) (-OGT: 9% and +OGT: 9%, p=0.996). The three most common ICD-10 groups at readmission  
42 38 were diseases of the respiratory organs (ICD10: J00-J99) (-OGT: 29% and +OGT: 17%, p=0.069);  
43 39 injury, poisoning, and certain other consequences of external causes (ICD10: S00-T98) (-OGT: 11%  
44 40  
45 41  
46 42  
47 43  
48 44  
49 45  
50 46  
51 47  
52 48  
53 49  
54 50  
55 51  
56 52  
57 53  
58 54  
59 55  
60 56

*Does geriatric follow-up visits reduce hospital readmission among older patients discharged to temporary care at a skilled nursing facility - a before and after cohort study*

1 and +OGT: 12%,  $p=0.834$ ); and diseases of the circulatory system (ICD10: I00-I99) (-OGT: 10% and  
2 +OGT: 11%,  $p=0.692$ ).

3  
4 *Characteristics and outcome data for non-SNF patients (pre-OGT and post-OGT) (n=5,777)*

5 No difference in age, sex, CCI, and 30-days mortality was found between the pre-OGT (n=3,343) and  
6 post-OGT (n=2,434) groups, while the distribution of BI in the four subcategories differed significantly  
7 between groups ( $p=0.012$ ). BI 80-100: pre-OGT = 13.8% and post-OGT = 12.5%; BI 50-79: pre-OGT  
8 = 27.6% and post-OGT = 27.0%; BI 25-49: pre-OGT = 21.4% and post-OGT = 24.7%; BI 0-24: pre-  
9 OGT = 32.4% and post-OGT = 5.6%. Median [IQR] LOS of index-admission was 5.1 [3.1-7.9] days  
10 and 4.8 [2.9-6.9] days in pre-OGT and post-OGT groups, respectively ( $p<0.0001$ ) (table 1).

11 Among the pre-OGT and post-OGT groups the 30 days readmission rate was 26.5% (n=887) and  
12 27.8% (n=676) ( $p=0.295$ ), respectively. The cumulative incidence of readmission (95% CI) was 29.1%  
13 (27.5-30.7) in pre-OGT and 28.8% (27.0-30.7) in post-OGT (figure 4). No difference was found in the  
14 risk of readmission between the pre-OGT and post-OGT group, neither for unadjusted nor adjusted  
15 risk (HR (95%CI)) of 1.00 (0.90-1.10,  $p=0.922$ ) and 1.01 (0.91-1.11,  $p=0.920$ ), respectively.

16  
17 **Discussion**

18 This study shows that follow-up visits by an outgoing multidisciplinary geriatric team reduces hospital  
19 readmissions among patients discharged from a geriatric department to a skilled nursing facility. The  
20 results remained significant even after adjusting for sex, age, in hospital length of stay, comorbidity,  
21 and functional status. Further, the effect of the intervention was immediate and persistent throughout  
22 the study period.

23  
24 To our knowledge, only few other studies have assessed interventions to prevent readmission among  
25 patients discharged to SNF <sup>4-6 19</sup>. A retrospective study from Cleveland (US) demonstrated a  
26 significant reduction in readmission rates from 28% to 22% ( $p<0.001$ ) after implementation of a  
27 connected care model <sup>6</sup>. The applied model was very extensive with patients receiving visits from an  
28 outgoing team including doctors and nurses 4-5 times a week after discharge from hospital to SNF  
29 and telephone coverage at nights, weekends, and monthly meetings with multidisciplinary teams. This  
30 extensive model may be difficult to apply in other settings. Another US-study explored whether  
31 readmission could be reduced by implementing video conference to improve transition between  
32 hospital and a SNF <sup>5</sup>. Videoconference reduced the 30-day readmission rate from 24% to 15% (OR  
33 0.57 95% CI 0.34-0.96,  $p=0.04$ ). However, the prospective cohort study compared pre- and post-  
34 intervention rates in two different SNF's, and the effect was mainly due to an increase of readmission  
35 in the control-cohort rather than a reduction of readmissions in the intervention-group <sup>5</sup>. Interpretation  
36 and application of these studies' results to a different health care system, as the Danish, should be  
37 done with care, as large organizational variations exist across countries. A Danish randomized  
38 controlled trial studied the effect of comprehensive geriatric care offered to patients 65 years and  
39 older, referred from any hospital department to a rehabilitation unit <sup>19</sup>. The study did not show any  
40 reduction in 90 days hospital readmission rates in the intervention group compared to usual care.

*Does geriatric follow-up visits reduce hospital readmission among older patients discharged to temporary care at a skilled nursing facility - a before and after cohort study*

1  
2  
3  
4 1 However, the study did not explore 30-days readmission rates specifically and the negative result may  
5 2 be due to a spill over effect, i.e. the intervention may have affected the control group, and a non-real-  
6 3 life setting since the intervention was performed by a single geriatrician only <sup>19</sup>.  
8 4 Among the SNF-patients in our study, the pre-intervention 30-days readmission rate was 36%, which  
9 5 is high compared to an overall readmission rate of 18% among older hospitalised patients in Denmark  
11 6 <sup>28</sup>. However, it is well known that patients discharged to SNF or other post-acute care facilities have a  
12 7 higher risk of readmission. A study of patients discharged to post-acute care facility demonstrated a  
13 8 readmission rate of 22% and most readmissions (80%) occurred within 30 days of discharge <sup>28</sup>. Other  
15 9 studies on patients discharged to temporary care have shown 30-days readmission rates between 24-  
16 10 28% <sup>4-6</sup>. This variation in readmission rates between studies may be explained by differences in  
18 11 patient characteristics, since other studies have included all residents at a SNF including residents  
19 12 referred to the SNF from home or a surgical department. Our study solely included the most  
21 13 vulnerable patients discharged from a geriatric department, characterised by high age, low functional  
22 14 status, and multi-morbidity and therefore at highest risk of readmission <sup>8-10</sup>. Moreover, there may be  
23 15 differences in the definition of readmission <sup>29</sup>. Our definition included any unplanned hospital contact  
25 16 within 30 days of discharge, thereby including brief contacts to the emergency department.  
27 17 In-hospital LOS declined significantly during the study period. However, this decline was not reflected  
28 18 by a change in disease-burden since CCI or primary diagnoses of hospital admission remained  
29 19 unchanged. The trend towards shorter hospital stay over time seen in our study is also reported on a  
31 20 national and European basis <sup>30</sup>. In our study, LOS did not affect the readmission rate. The decrease in  
32 21 LOS was higher among patients discharged to SNF compared to patients not discharged to SNF. This  
33 22 indicates that the intervention may have affected LOS. The decision of when to discharge is based on  
35 23 the geriatrician's clinical judgement, but may have been affected by a knowledge of an OGT follow-up  
36 24 shortly after discharge, enabling patients to earlier discharge. However, the municipality decides,  
38 25 based on availability whether care and rehabilitation is provided at the SNF or at home. The  
39 26 geriatricians are seldom aware of this decision when discharge is planned. We therefore consider it  
41 27 less likely, that the intervention has affected LOS. However, other non-identified factors may have had  
42 28 an impact on the ability of SNF-patients to be discharged sooner. This must be addressed in future  
43 29 studies.

45 30  
47 31 We found no difference in the proportion of men and women, which is surprising, since other studies  
48 32 of similar geriatric cohorts have shown a higher proportion of women compared to men <sup>31</sup>. However,  
49 33 our sex-ratio corresponds to the sex-ratio shown in the Danish national database of geriatrics 2019 <sup>32</sup>.

### 34 35 **Strengths and limitations of this study**

54 36 Our study has limitations. Firstly, this was a before and after study, which has a risk of overestimating  
55 37 the effect <sup>33</sup> due to residual confounding. The participants in the intervention group (+OGT) may have  
56 38 been exposed to other non-identified factors compared to the control group. However, readmission  
57 39 rates among non-SNF patients remained unchanged in the pre-OGT and post-OGT groups  
58 40 highlighting that no general change in the pattern of admissions occurred during the study period.

*Does geriatric follow-up visits reduce hospital readmission among older patients discharged to temporary care at a skilled nursing facility - a before and after cohort study*

1  
2  
3  
4 1 Secondly, this was a single centre study, which limits the generalizability of study results. In addition,  
5 2 as no consensus-definition of SNF exists, other studies may represent differently organized SNF's,  
6 3 dissimilar patient populations, and other discharge procedures from geriatric departments worldwide,  
7 4 also limiting the generalizability. Thirdly, the study only included data on hospital readmissions at  
8 5 Odense University Hospital, which may underestimate the risk of readmissions. However, only  
9 6 patients, who would have travelled or moved to other municipalities outside Odense, would be at risk  
10 7 of readmission to other hospitals than Odense University Hospital. In our dataset, we were able to  
11 8 track all patients, and none had residence outside the municipality of Odense within 30 days after  
12 9 discharge.

13 10 The study also has several strengths. We used data from registers with no patients lost to follow-up.  
14 11 In addition, we performed power- and sample size calculation when planning the study to ensure  
15 12 appropriate length of study period. The adjusted analysis involved patient characteristics including  
16 13 measures of activities of daily living (Barthel-Index), comorbidity (Charlson Comorbidity Index), and  
17 14 LOS, which are important risk factors for readmission<sup>8-10</sup>. Furthermore, our results are strengthened  
18 15 by accounting for the competing risk of death in our analysis, censoring those who died with-in 30  
19 16 days of discharge. Finally, the study was carried out in a real-life setting and therefore implementable  
20 17 in similar settings.

21 18  
22 19 Several elements of our OGT-intervention may have been crucial in the prevention of readmissions.  
23 20 The OGT facilitated a close co-operation between hospital, patient, and SNF, which potentially  
24 21 prevented miscommunication and loss of information in the transition from secondary to primary care  
25 22 sector. Furthermore, early detection and correction of ambiguities and inadequate hospital care plans  
26 23 may have led to improved and shared goals of care for the benefit of the patient. A shared  
27 24 responsibility of the patient in the early days after discharge may have ensured confidence among  
28 25 patients, relatives, and caregivers and prevented unnecessary contacts to doctors on call or  
29 26 emergency doctors. Lastly, reassessment of the patient's medical condition may have led to early  
30 27 detection and treatment of recurrence of disease, thereby preventing readmission.

31 28  
32 29 Despite the potential benefit of outgoing hospital teams, the intervention is costly and hospital  
33 30 resources are redistributed outside the hospital. In our set-up, limiting the post-discharge follow-up  
34 31 visit to patients discharged to SNF reduced the time-expenditure since all patients were discharged to  
35 32 the same SNF and therefore the intervention may have been economical rentable. Cost-effective  
36 33 analysis of the intervention remains to be assessed before dissemination of this model. Our study  
37 34 does not give insight to sub-elements of the intervention, but further studies with an explorative or  
38 35 qualitative design should address this. Such insight may be valuable in the development of less costly  
39 36 interventions, such as telemedicine. Telemedicine and videoconference are likely to be less costly  
40 37 and perhaps as effective tools for post-discharge follow-up, which calls for further exploration.

41 38  
42 39 **Conclusion**  
43 40  
44 41  
45 42  
46 43  
47 44  
48 45  
49 46  
50 47  
51 48  
52 49  
53 50  
54 51  
55 52  
56 53  
57 54  
58 55  
59 56  
60 57



*Does geriatric follow-up visits reduce hospital readmission among older patients discharged to temporary care at a skilled nursing facility - a before and after cohort study*

1  
2  
3  
4 1 Follow-up visits by an outgoing multidisciplinary geriatric team significantly reduced 30-days  
5 2 readmission rates by 28% in older vulnerable patients recently discharged from hospital to a skilled  
6 3 nursing facility.

7 4  
8 4  
9 5 **Author Contributions**

10 6 KT is the guarantor of the study. KT and AF directed and contributed equally to all aspects of this  
11 7 manuscript. KAR, JR, and LM contributed to study design, data interpretation, and writing. All authors  
12 8 have commented, read, and approved the final manuscript.

13 9 **Funding**

14 10 The Region of Southern Denmark and Odense University Hospital funded the study (14-17636). The  
15 11 funders were not involved in the design and conduct of the study; collection, management, analysis,  
16 12 and interpretation of the data; preparation, review, or approval of the manuscript; and decision to  
17 13 submit the manuscript for publication.

18 14  
19 15 **Conflicts of Interest statement**

20 16 The authors declare that no conflicts of interest are associated with this publication.

21 17  
22 18 **Patient and public involvement:**

23 19 Neither patients nor the public were involved in the design, conduct, reporting, or dissemination of the  
24 20 study.

25 21  
26 22 **Patient consent for publication:**

27 23 Not required

28 24  
29 25 **Provenance and peer review**

30 26 Not commissioned; externally peer review

31 27  
32 28 **Data availability**

33 29 Data are available upon reasonable request

34 30  
35 31 **Acknowledgements**

36 32 We wish to thank Rolf Kjærby (Odense University Hospital) and Rune Pedersen (Region of Southern  
37 33 Denmark) for their assistance in retrieving and merging data from the respective electronic patient  
38 34 journals and administrative systems, and Eva Sandberg and Inge Pedersen (OPEN - Open Patient  
39 35 data Explorative Network, Odense University Hospital, Region of Southern Denmark) for statistical  
40 36 counselling. A special thanks to the personnel at Lysningen (Odense Municipality) and the  
41 37 Department of Geriatric Medicines (Odense University Hospital) for their commitment and willingness  
42 38 to implement the outgoing geriatric function and cross-sectoral collaboration.

*Does geriatric follow-up visits reduce hospital readmission among older patients discharged to temporary care at a skilled nursing facility - a before and after cohort study*

## 1 Legends

- 2 Figure 1: Timeline of patients discharged from the Department of Geriatric Medicine according to  
3 discharge destination and initiation of outgoing geriatric team. Abbreviations: OGT: outgoing geriatric  
4 team, pre-OGT; before implementation of OGT, post-OGT; after implementation of OGT, SNF; skilled  
5 nursing facility
- 6
- 7 Figure 2: A statistical process control chart of monthly readmission rates during the study period  
8 among patients discharged to skilled nursing facility and outgoing geriatric team compared to patients  
9 discharged to skilled nursing facility only. Abbreviations: OGT: outgoing geriatric team; SNF: Skilled  
10 Nursing Facility; CI: Confidence Interval
- 11
- 12 Figure 3: Kaplan-Meier curves of cumulative incidence of 30-days readmissions for any unplanned  
13 readmission for patients discharged to skilled nursing facility and outgoing geriatric team compared to  
14 patients discharged to skilled nursing facility only. Abbreviations: OGT: outgoing geriatric team
- 15
- 16 Figure 4: Kaplan-Meier curves of cumulative incidence of 30-days readmissions for any unplanned  
17 readmission for patients discharged to own home. Before and after implementation of outgoing  
18 geriatric team (pre-OGT and post-OGT). Abbreviations: OGT: outgoing geriatric team

*Does geriatric follow-up visits reduce hospital readmission among older patients discharged to temporary care at a skilled nursing facility - a before and after cohort study*

1 Table 1: Characteristics of patients discharged from Department of Geriatric Medicine to a skilled  
2 nursing facility without follow-up (-OGT) or with follow-up (+OGT) by an outgoing geriatric team and  
3 patients not discharged to a skilled nursing facility from Department of Geriatric Medicine before (pre-  
4 OGT) and after (post-OGT) implementation of outgoing geriatric team

|                                            | <b>-OGT<br/>(n=440)</b> | <b>+OGT<br/>(n=407)</b> | <b>p</b> | <b>pre-OGT<br/>(n=3,343)</b> | <b>post-OGT<br/>(n=2,434)</b> | <b>p</b> |
|--------------------------------------------|-------------------------|-------------------------|----------|------------------------------|-------------------------------|----------|
| Age, y, mean (SD)                          | 84.2 (8.0)              | 84.2 (8.5)              | 0.980    | 82.7 (8.8)                   | 83.1 (8.9)                    | 0.144    |
| Female, n (%)                              | 240 (54.6)              | 235 (57.9)              | 0.329    | 1,805 (54.0)                 | 1,307 (53.7)                  | 0.817    |
| Barthel Index, n (%)                       |                         |                         |          |                              |                               |          |
| 80-100                                     | 12 (2.8)                | 9 (2.2)                 | 0.600    | 462 (13.8)                   | 303 (12.5)                    | 0.012    |
| 50-79                                      | 80 (18.7)               | 71 (17.4)               |          | 924 (27.6)                   | 655 (27.0)                    |          |
| 25-49                                      | 121 (28.3)              | 117 (28.8)              |          | 716 (21.4)                   | 600 (24.7)                    |          |
| 0-24                                       | 215 (50.2)              | 191 (46.9)              |          | 1,083 (32.4)                 | 738 (30.3)                    |          |
| missing                                    | 12 (2.7)                | 19 (4.7)                |          | 158 (4.7)                    | 129 (5.6)                     |          |
| CCI, median [IQR]                          | 2 [1-3]                 | 2 [1-3]                 | 0.182    | 2 [1-4]                      | 2 [1-3]                       | 0.146    |
| CCI, n (%)                                 |                         |                         |          |                              |                               |          |
| 0                                          | 93 (21.1)               | 99 (24.3)               | 0.370    | 682 (20.4)                   | 521 (21.4)                    | 0.450    |
| 1-2                                        | 165 (37.5)              | 157 (38.6)              |          | 1,233 (36.9)                 | 911 (37.4)                    |          |
| ≥3                                         | 182 (41.4)              | 151 (37.1)              |          | 1,428 (42.7)                 | 1,002 (41.2)                  |          |
| LOS, days (index admission) median [IQR]   | 7.8 [5.0-12.8]          | 6.0 [3.9-10.0]          | 0.0001   | 5.1 [3.1-7.9]                | 4.8 [2.9-6.9]                 | 0.0001   |
| Died within 30 days after discharge, n (%) | 75 (17.1)               | 68 (16.7)               | 0.896    | 360 (10.8)                   | 233 (9.6)                     | 0.139    |

5 Abbreviations: SD standard deviation, CCI: Charlson Comorbidity Index, LOS: length of stay (in  
6 hospital), IQR: inter quartile range, OGT: outgoing geriatric team

Does geriatric follow-up visits reduce hospital readmission among older patients discharged to temporary care at a skilled nursing facility - a before and after cohort study

## References

1. Clegg A, Young J, Iliffe S, et al. Frailty in elderly people. *Lancet* 2013;381(9868):752-62. doi: 10.1016/s0140-6736(12)62167-9 [published Online First: 2013/02/12]
2. Creditor MC. Hazards of hospitalization of the elderly. *Ann Intern Med* 1993;118(3):219-23. doi: 10.7326/0003-4819-118-3-199302010-00011 [published Online First: 1993/02/01]
3. Hubbard RE, Peel NM, Samanta M, et al. Frailty status at admission to hospital predicts multiple adverse outcomes. *Age Ageing* 2017;46(5):801-06. doi: 10.1093/ageing/afx081 [published Online First: 2017/05/23]
4. Yoo JW, Jabeen S, Bajwa T, Jr., et al. Hospital readmission of skilled nursing facility residents: a systematic review. *Res Gerontol Nurs* 2015;8(3):148-56. doi: 10.3928/19404921-20150129-01 [published Online First: 2015/02/25]
5. Moore AB, Krupp JE, Dufour AB, et al. Improving Transitions to Postacute Care for Elderly Patients Using a Novel Video-Conferencing Program: ECHO-Care Transitions. *Am J Med* 2017;130(10):1199-204. doi: 10.1016/j.amjmed.2017.04.041 [published Online First: 2017/05/30]
6. Kim LD, Kou L, Hu B, et al. Impact of a Connected Care Model on 30-Day Readmission Rates from Skilled Nursing Facilities. *J Hosp Med* 2017;12(4):238-44. doi: 10.12788/jhm.2710 [published Online First: 2017/04/16]
7. Fournaise A, Espensen N, Jakobsen S, et al. Increasing primary health-care services are associated with acute short-term hospitalization of Danes aged 70 years and older. *European Geriatric Medicine* 2017;8(5):435-39. doi: <https://doi.org/10.1016/j.eurger.2017.07.018>
8. Bahrmann A, Benner L, Christ M, et al. The Charlson Comorbidity and Barthel Index predict length of hospital stay, mortality, cardiovascular mortality and rehospitalization in unselected older patients admitted to the emergency department. *Aging Clin Exp Res* 2019;31(9):1233-42. doi: 10.1007/s40520-018-1067-x [published Online First: 2018/11/09]
9. Pedersen MK, Meyer G, Uhrenfeldt L. Risk factors for acute care hospital readmission in older persons in Western countries: a systematic review. *JBIC Database System Rev Implement Rep* 2017;15(2):454-85. doi: 10.11124/jbisrir-2016-003267 [published Online First: 2017/02/09]
10. Wang P, Wang Q, Li F, et al. Relationship Between Potentially Inappropriate Medications And The Risk Of Hospital Readmission And Death In Hospitalized Older Patients. *Clin Interv Aging* 2019;14:1871-78. doi: 10.2147/CIA.S218849 [published Online First: 2019/12/07]
11. Lembeck MA, Thygesen LC, Sorensen BD, et al. Effect of single follow-up home visit on readmission in a group of frail elderly patients - a Danish randomized clinical trial. *BMC Health Serv Res* 2019;19(1):751. doi: 10.1186/s12913-019-4528-9 [published Online First: 2019/10/28]
12. Lindegaard Pedersen J, Pedersen PU, Damsgaard EM. Nutritional Follow-Up after Discharge Prevents Readmission to Hospital - A Randomized Clinical Trial. *J Nutr Health Aging* 2017;21(1):75-82. doi: 10.1007/s12603-016-0745-7 [published Online First: 2016/12/22]
13. Lisby M, Klingenberg M, Ahrensberg JM, et al. Clinical impact of a comprehensive nurse-led discharge intervention on patients being discharged home from an acute medical unit: Randomised controlled trial. *Int J Nurs Stud* 2019;100:103411. doi: 10.1016/j.ijnurstu.2019.103411 [published Online First: 2019/10/20]
14. Thygesen LC, Fokdal S, Gjørup T, et al. Can municipality-based post-discharge follow-up visits including a general practitioner reduce early readmission among the fragile elderly (65+ years old)? A randomized controlled trial. *Scand J Prim Health Care* 2015;33(2):65-73. doi: 10.3109/02813432.2015.1041831 [published Online First: 2015/06/11]

Does geriatric follow-up visits reduce hospital readmission among older patients discharged to temporary care at a skilled nursing facility - a before and after cohort study

15. Finlayson K, Chang AM, Courtney MD, et al. Transitional care interventions reduce unplanned hospital readmissions in high-risk older adults. *BMC Health Serv Res* 2018;18(1):956. doi: 10.1186/s12913-018-3771-9 [published Online First: 2018/12/14]
16. Hansen LO, Young RS, Hinami K, et al. Interventions to reduce 30-day rehospitalization: a systematic review. *Ann Intern Med* 2011;155(8):520-8. doi: 10.7326/0003-4819-155-8-201110180-00008 [published Online First: 2011/10/19]
17. Renaudin P, Boyer L, Esteve MA, et al. Do pharmacist-led medication reviews in hospitals help reduce hospital readmissions? A systematic review and meta-analysis. *Br J Clin Pharmacol* 2016;82(6):1660-73. doi: 10.1111/bcp.13085 [published Online First: 2016/08/12]
18. Berkowitz RE, Fang Z, Helfand BK, et al. Project ReEngineered Discharge (RED) lowers hospital readmissions of patients discharged from a skilled nursing facility. *J Am Med Dir Assoc* 2013;14(10):736-40. doi: 10.1016/j.jamda.2013.03.004 [published Online First: 2013/04/24]
19. Zintchouk D, Gregersen M, Lauritzen T, et al. Geriatrician-performed comprehensive geriatric care in older adults referred to an outpatient community rehabilitation unit: A randomized controlled trial. *Eur J Intern Med* 2018;51:18-24. doi: 10.1016/j.ejim.2018.01.022 [published Online First: 2018/02/06]
20. Gardner RL, Pelland K, Youssef R, et al. Reducing Hospital Readmissions Through a Skilled Nursing Facility Discharge Intervention: A Pragmatic Trial. *J Am Med Dir Assoc* 2020;21(4):508-12. doi: 10.1016/j.jamda.2019.10.001 [published Online First: 2019/12/10]
21. Vrangbaek K. Denmark. In: Tikkanen R, Osborn R, Mossialos E, et al., eds. International Health Care System Profiles: The Commonwealth Fund 2020.
22. Esbjerg municipality, Copenhagen municipality, Aarhus municipality, et al. The 6-cities key figures 2019 [6-by nøgletal 2019] 2019 [cited 2020 20. september]. Available from: <https://www.odense.dk/om-kommunen/statistikker-og-regnskaber/odense-i-tal/6-by-nogletal>.
23. authorities TDh. Description of indicators - national aim [Beskrivelse af indikatorer - de nationale mål]. 2016
24. Matzen LE, Jepsen DB, Ryg J, et al. Functional level at admission is a predictor of survival in older patients admitted to an acute geriatric unit. *BMC Geriatr* 2012;12:32. doi: 10.1186/1471-2318-12-32 [published Online First: 2012/06/27]
25. Thygesen SK, Christiansen CF, Christensen S, et al. The predictive value of ICD-10 diagnostic coding used to assess Charlson comorbidity index conditions in the population-based Danish National Registry of Patients. *BMC Med Res Methodol* 2011;11:83. doi: 10.1186/1471-2288-11-83 [published Online First: 2011/05/31]
26. Vandembroucke JP, von Elm E, Altman DG, et al. Strengthening the Reporting of Observational Studies in Epidemiology (STROBE): explanation and elaboration. *Int J Surg* 2014;12(12):1500-24. doi: 10.1016/j.ijsu.2014.07.014 [published Online First: 2014/07/22]
27. National Committee on Health Research Ethics. What to notify? 2020 [Available from: <https://en.nvk.dk/how-to-notify/what-to-notify> accessed 15th of May 2020.
28. The Danish Health Authority. Health agreements 2020 [cited 2020 June 6th]. Available from: <https://www.esundhed.dk/home/emner/patienter%20og%20sygehuse/sundhedsaftaler> accessed June 6 2020.
29. Kristensen SR, Bech M, Quentin W. A roadmap for comparing readmission policies with application to Denmark, England, Germany and the United States. *Health Policy* 2015;119(3):264-73. doi: 10.1016/j.healthpol.2014.12.009 [published Online First: 2014/12/31]
30. European Observatory on Health Systems and Policies (OECD and WHO). State of Health in the EU, Denmark, Country Health Profile 2019, 2019.

Does geriatric follow-up visits reduce hospital readmission among older patients discharged to temporary care at a skilled nursing facility - a before and after cohort study

- 1  
2  
3  
4 1 31. Ryg J, Engberg H, Mariadas P, et al. Barthel Index at hospital admission is associated  
5 2 with mortality in geriatric patients: a Danish nationwide population-based cohort  
6 3 study. *Clin Epidemiol* 2018;10:1789-800. doi: 10.2147/clip.S176035 [published  
7 4 Online First: 2018/12/21]  
8 5 32. Danish Clinical Quality Program [Regionernes Kliniske Kvalitetsudviklingsprogram].  
9 6 Annual report for the Danish national Geriatric Database, 2019 [Årsrapport for den  
10 7 landsdækkende database for geriatri, 2019] 2019 [cited 2020 15 september].  
11 8 Available from:  
12 9 [https://www.sundhed.dk/content/cms/9/4709\\_geriatri\\_aarsrapport2019\\_endelig\\_anon](https://www.sundhed.dk/content/cms/9/4709_geriatri_aarsrapport2019_endelig_anonymiseret.pdf)  
13 10 [ymiseret.pdf](https://www.sundhed.dk/content/cms/9/4709_geriatri_aarsrapport2019_endelig_anonymiseret.pdf) accessed 22. sept. 2020.  
14 11 33. William R. Shaddish TDC, Donald T. Campbell. Experimental and Quasi-Experimental  
15 12 Designs for Generalized Causal Inference 2nd Edition. 2 edition ed2001.  
16 13

For peer review only

1 January  
2016

12 March  
2018

25 February  
2020

1  
2  
3  
4  
5  
6  
7  
8  
9  
10

Patients discharged to SNF  
(-OGT)  
**n=440**

Patients discharged to SNF and OGT  
(+OGT)  
**n=407**

Patients discharged to NON-SNF  
(pre-OGT)  
**n=3343**

Patients discharged to NON-SNF  
(post-OGT)  
**n=2434**

Patients discharged to SNF (-OGT)

Patients discharged to SNF and OGT (+OGT)

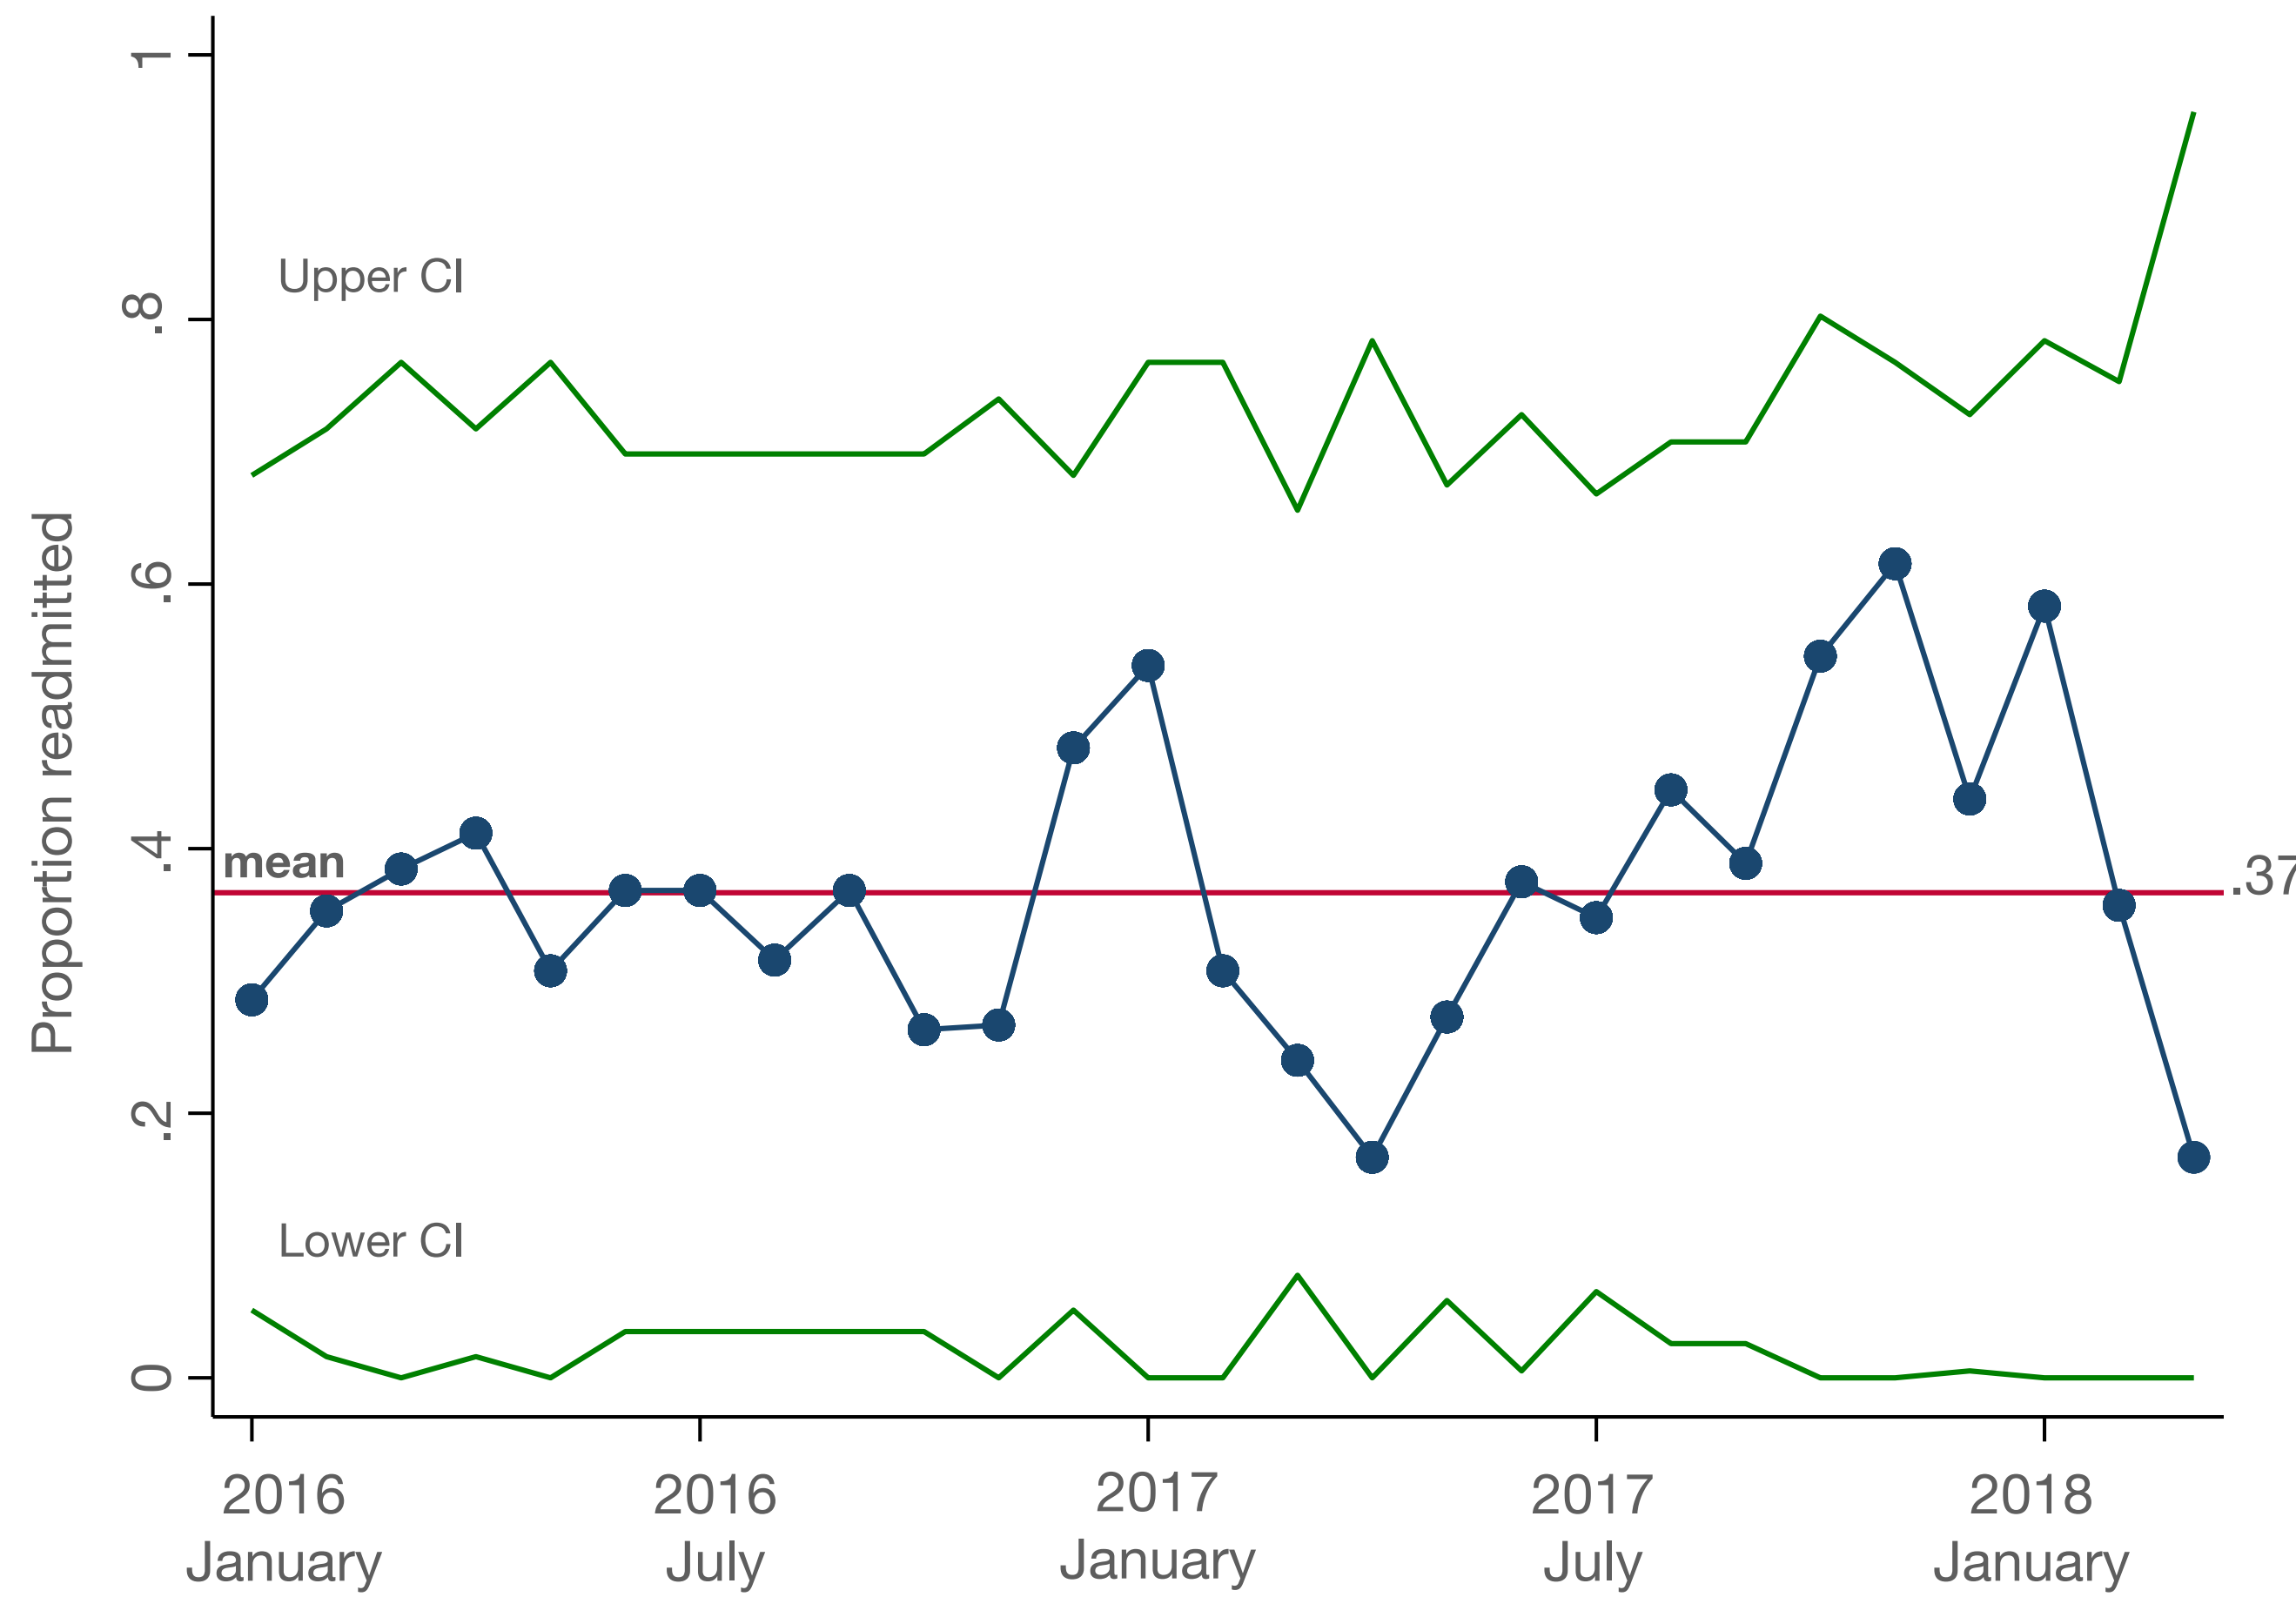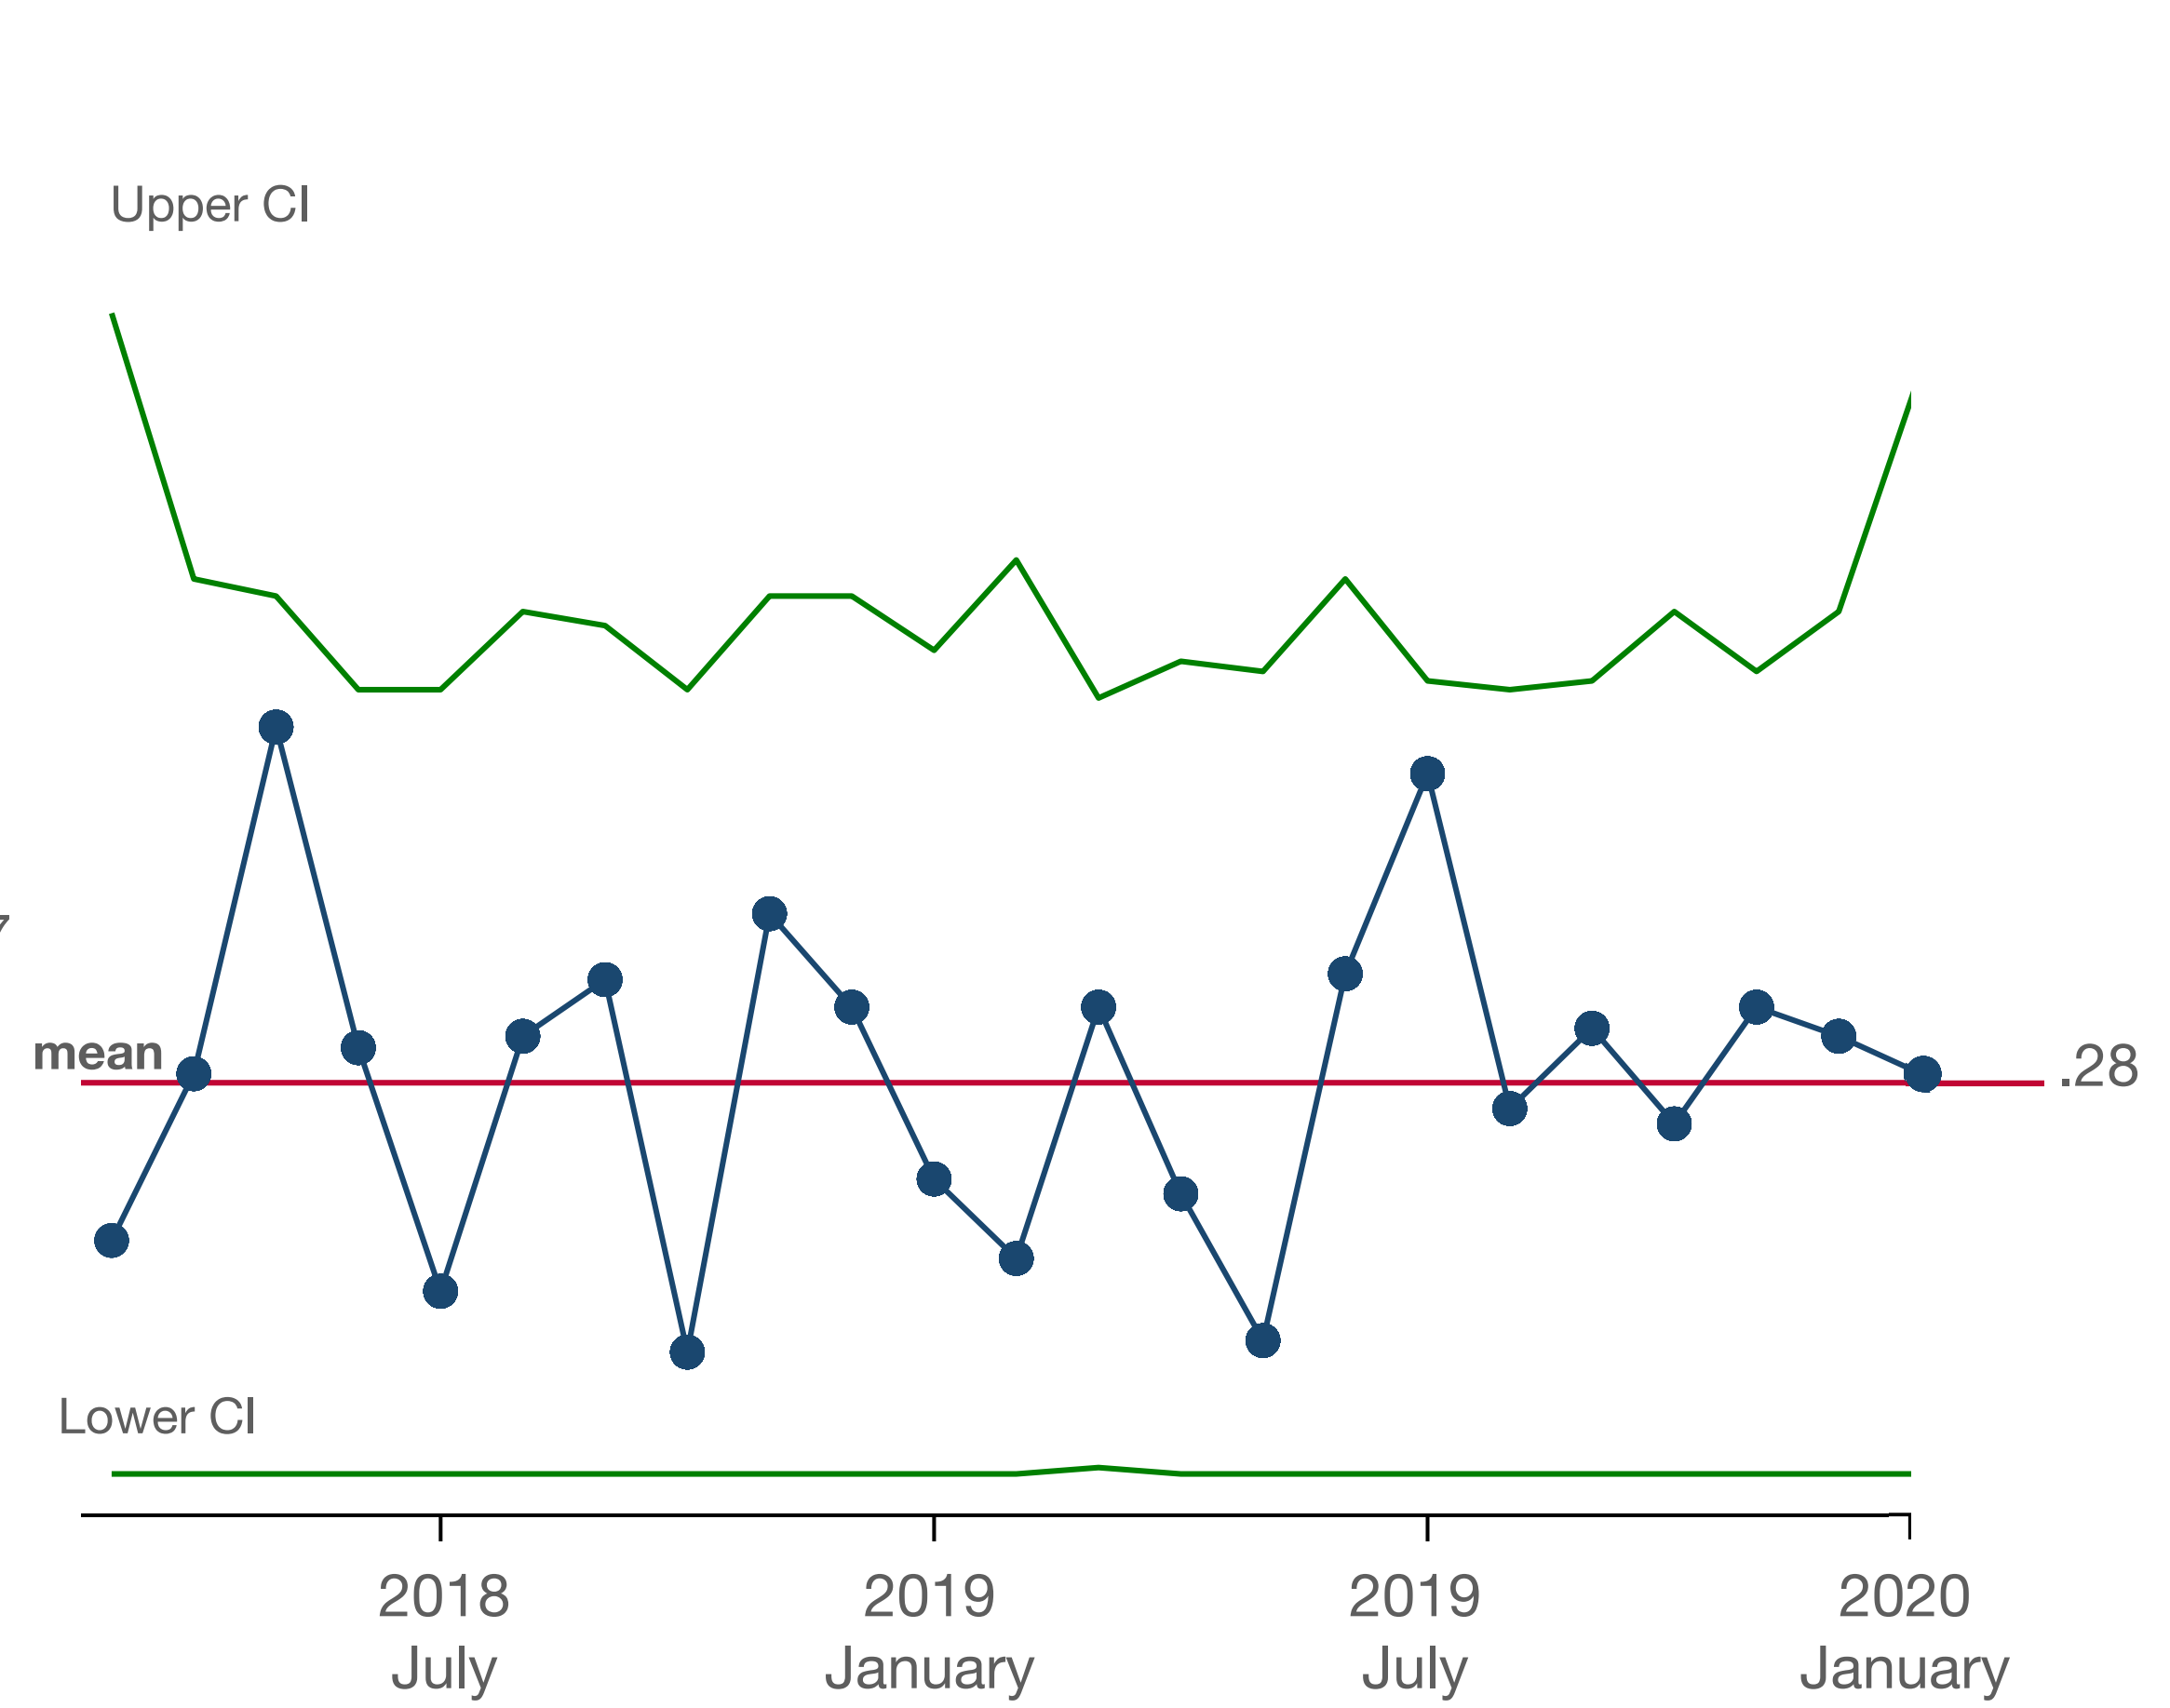



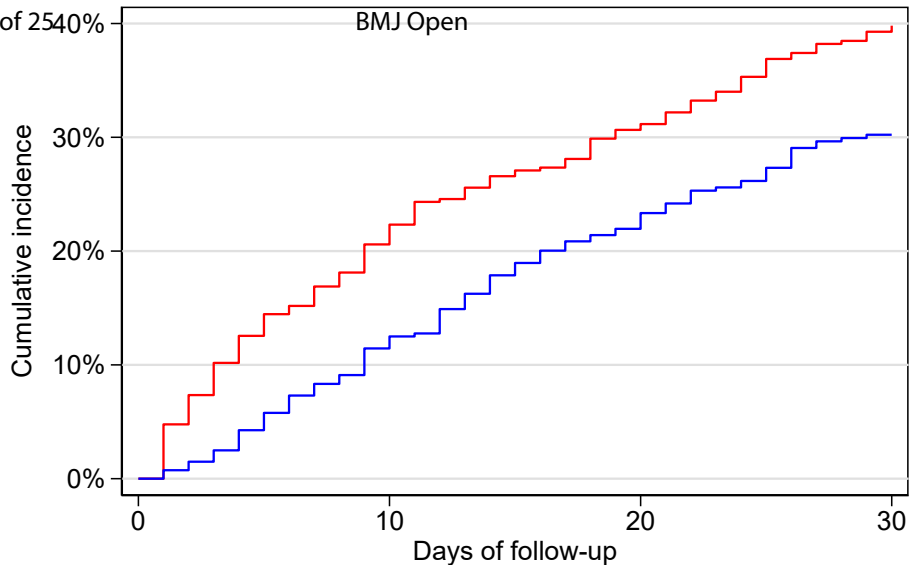

Number at risk

-OGT 440

320

271

227

+OGT 403

337

282

239

For peer review only - <http://bmjopen.bmj.com/site/about/guidelines.xhtml>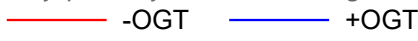

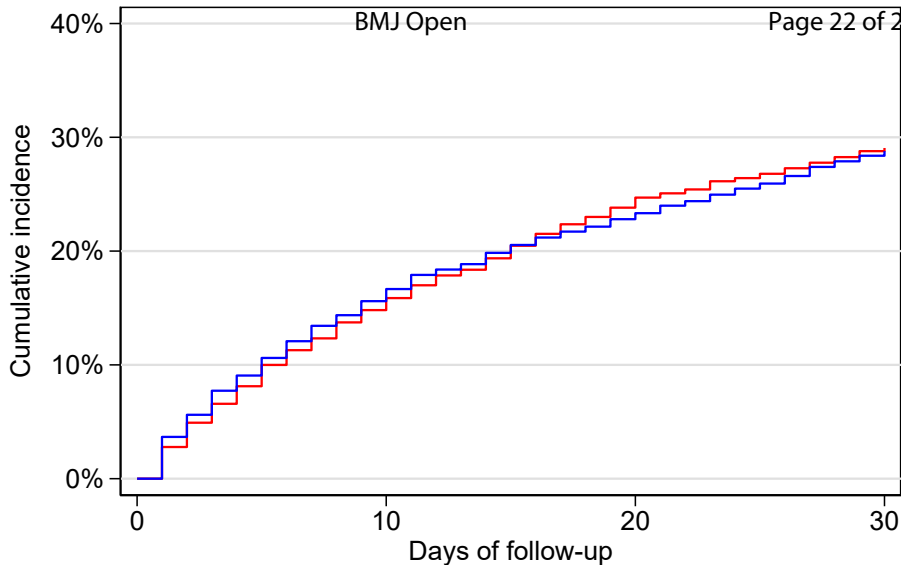

Number at risk

pre-OGT 3341

2584

2238

2030

post-OGT 2425

1980

1761

1600

For peer review only - <http://bmjopen.bmj.com/site/about/guidelines.xhtml>

— pre-OGT — post-OGT

# Reporting checklist for quality improvement in health care.

Based on the SQUIRE guidelines.

## Instructions to authors

Complete this checklist by entering the page numbers from your manuscript where readers will find each of the items listed below.

Your article may not currently address all the items on the checklist. Please modify your text to include the missing information. If you are certain that an item does not apply, please write "n/a" and provide a short explanation.

Upload your completed checklist as an extra file when you submit to a journal.

In your methods section, say that you used the SQUIRE reporting guidelines, and cite them as:

Ogrinc G, Davies L, Goodman D, Batalden P, Davidoff F, Stevens D. SQUIRE 2.0 (Standards for Quality Improvement Reporting Excellence): revised publication guidelines from a detailed consensus process

|                     | Reporting Item                                                                                                                                                                                                                                      | Page Number |
|---------------------|-----------------------------------------------------------------------------------------------------------------------------------------------------------------------------------------------------------------------------------------------------|-------------|
| <b>Title</b>        |                                                                                                                                                                                                                                                     |             |
|                     | <a href="#">#1</a> Indicate that the manuscript concerns an initiative to improve healthcare (broadly defined to include the quality, safety, effectiveness, patientcenteredness, timeliness, cost, efficiency, and equity of healthcare)           | 1           |
| <b>Abstract</b>     |                                                                                                                                                                                                                                                     |             |
|                     | <a href="#">#02a</a> Provide adequate information to aid in searching and indexing                                                                                                                                                                  | 3           |
|                     | <a href="#">#02b</a> Summarize all key information from various sections of the text using the abstract format of the intended publication or a structured summary such as: background, local problem, methods, interventions, results, conclusions | 2           |
| <b>Introduction</b> |                                                                                                                                                                                                                                                     |             |
| Problem             | <a href="#">#3</a> Nature and significance of the local problem                                                                                                                                                                                     | 4           |

1 description

2 Available [#4](#) Summary of what is currently known about the problem, including 4  
3 knowledge relevant previous studies

4 Rationale [#5](#) Informal or formal frameworks, models, concepts, and / or theories used 4  
5 to explain the problem, any reasons or assumptions that were used to  
6 develop the intervention(s), and reasons why the intervention(s) was  
7 expected to work

8 Specific aims [#6](#) Purpose of the project and of this report 4

9 **Methods**

10 Context [#7](#) Contextual elements considered important at the outset of introducing 4  
11 the intervention(s)

12 Intervention(s) [#08a](#) Description of the intervention(s) in sufficient detail that others could 5  
13 reproduce it

14 Intervention(s) [#08b](#) Specifics of the team involved in the work 5

15 Study of the [#09a](#) Approach chosen for assessing the impact of the intervention(s) 6  
16 Intervention(s)

17 Study of the [#09b](#) Approach used to establish whether the observed outcomes were due to 6  
18 Intervention(s) the intervention(s)

19 Measures [#10a](#) Measures chosen for studying processes and outcomes of the 5-6  
20 intervention(s), including rationale for choosing them, their operational  
21 definitions, and their validity and reliability

22 Measures [#10b](#) Description of the approach to the ongoing assessment of contextual 5-6  
23 elements that contributed to the success, failure, efficiency, and cost

24 Measures [#10c](#) Methods employed for assessing completeness and accuracy of data 5-6

25 Analysis [#11a](#) Qualitative and quantitative methods used to draw inferences from the 6  
26 data

27 Analysis [#11b](#) Methods for understanding variation within the data, including the 6  
28 effects of time as a variable

29 Ethical [#12](#) Ethical aspects of implementing and studying the intervention(s) and 7  
30 considerations how they were addressed, including, but not limited to, formal ethics  
31 review and potential conflict(s) of interest

**Results**

|  |                      |                                                                                                                                                                                         |     |
|--|----------------------|-----------------------------------------------------------------------------------------------------------------------------------------------------------------------------------------|-----|
|  | <a href="#">#13a</a> | Initial steps of the intervention(s) and their evolution over time (e.g., time-line diagram, flow chart, or table), including modifications made to the intervention during the project | 7-8 |
|  | <a href="#">#13b</a> | Details of the process measures and outcome                                                                                                                                             | 7-8 |
|  | <a href="#">#13c</a> | Contextual elements that interacted with the intervention(s)                                                                                                                            | 7-8 |
|  | <a href="#">#13d</a> | Observed associations between outcomes, interventions, and relevant contextual elements                                                                                                 | 7-8 |
|  | <a href="#">#13e</a> | Unintended consequences such as unexpected benefits, problems, failures, or costs associated with the intervention(s).                                                                  | 7-8 |
|  | <a href="#">#13f</a> | Details about missing data                                                                                                                                                              | 7-8 |

**Discussion**

|                |                      |                                                                                                                                              |      |
|----------------|----------------------|----------------------------------------------------------------------------------------------------------------------------------------------|------|
| Summary        | <a href="#">#14a</a> | Key findings, including relevance to the rationale and specific aims                                                                         | 8-10 |
| Summary        | <a href="#">#14b</a> | Particular strengths of the project                                                                                                          | 9    |
| Interpretation | <a href="#">#15a</a> | Nature of the association between the intervention(s) and the outcomes                                                                       | 8-10 |
| Interpretation | <a href="#">#15b</a> | Comparison of results with findings from other publications                                                                                  | 8-10 |
| Interpretation | <a href="#">#15c</a> | Impact of the project on people and systems                                                                                                  | 10   |
| Interpretation | <a href="#">#15d</a> | Reasons for any differences between observed and anticipated outcomes, including the influence of context                                    | 9    |
| Interpretation | <a href="#">#15e</a> | Costs and strategic trade-offs, including opportunity costs                                                                                  | 10   |
| Limitations    | <a href="#">#16a</a> | Limits to the generalizability of the work                                                                                                   | 9-10 |
| Limitations    | <a href="#">#16b</a> | Factors that might have limited internal validity such as confounding, bias, or imprecision in the design, methods, measurement, or analysis | 9-10 |
| Limitations    | <a href="#">#16c</a> | Efforts made to minimize and adjust for limitations                                                                                          | 9-10 |
| Conclusion     | <a href="#">#17a</a> | Usefulness of the work                                                                                                                       | 10   |
| Conclusion     | <a href="#">#17b</a> | Sustainability                                                                                                                               | 10   |
| Conclusion     | <a href="#">#17c</a> | Potential for spread to other contexts                                                                                                       | 10   |

|    |                    |                      |                                                                                                                                                     |    |
|----|--------------------|----------------------|-----------------------------------------------------------------------------------------------------------------------------------------------------|----|
| 1  | Conclusion         | <a href="#">#17d</a> | Implications for practice and for further study in the field                                                                                        | 10 |
| 2  |                    |                      |                                                                                                                                                     |    |
| 3  | Conclusion         | <a href="#">#17e</a> | Suggested next steps                                                                                                                                | 10 |
| 4  |                    |                      |                                                                                                                                                     |    |
| 5  | <b>Other</b>       |                      |                                                                                                                                                     |    |
| 6  | <b>information</b> |                      |                                                                                                                                                     |    |
| 7  |                    |                      |                                                                                                                                                     |    |
| 8  |                    |                      |                                                                                                                                                     |    |
| 9  | Funding            | <a href="#">#18</a>  | Sources of funding that supported this work. Role, if any, of the funding organization in the design, implementation, interpretation, and reporting | 10 |
| 10 |                    |                      |                                                                                                                                                     |    |
| 11 |                    |                      |                                                                                                                                                     |    |
| 12 |                    |                      |                                                                                                                                                     |    |

13 The SQUIRE 2.0 checklist is distributed under the terms of the Creative Commons Attribution License CC BY-  
14 NC 4.0. This checklist was completed on 06. November 2020 using <https://www.goodreports.org/>, a tool made  
15 by the [EQUATOR Network](#) in collaboration with [Penelope.ai](#)  
16  
17  
18  
19  
20  
21  
22  
23  
24  
25  
26  
27  
28  
29  
30  
31  
32  
33  
34  
35  
36  
37  
38  
39  
40  
41  
42  
43  
44  
45  
46  
47  
48  
49  
50  
51  
52  
53  
54  
55  
56  
57  
58  
59  
60
